# Supplementary material
Source: publisher figshare collection journal article supplement (https://acs.figshare.com/ndownloader/files/21951276)
Supplement: Supplementary file 1 [file 21951276]

## Sheet: Sheet1
Supporting information Table S3: LFQ differences relative to the control cultured at 30°C for surface proteins detected in LS, TS and ECF fractions and the corresponding CFEs
Protein IDs	Gene locus	Gene symbol	Protein name	Protein symbol	Functional Class	Function	Uniprot annotation/description	Predicted subcellular location	Spase cleavage site	Also in ECF	Also in TS	Also in LiCl-sucrose	Lipoproteins	Cytoplasmic-surface proteins	LS fraction: Log2_35/30	LS fraction: Log2_40/30	LS fraction: Log2_45/30	TS fraction: Log2_35/30	TS fraction: Log2_40/30	TS fraction: Log2_45/30	ECF fraction: Log2_35/30	ECF fraction: Log2_40/30	ECF fraction: Log2_45/30	CFE fraction: Log2_35/30	CFE fraction: Log2_40/30	CFE fraction: Log2_45/30
K0N8E6	BN194_05520	cysK	cysteine synthase	CysK	Amino acid-related metabolism	L-cysteine biosynthesis		cytoplasm			in TS	in LS		Yes	0.905297	0.99762	1.41038	1.39747	0.678726	1.77318				-0.477262	-0.27586	-0.16269
K0NAC2	BN194_24680	pepC_2	aminopeptidase C	PepC2	Amino acid-related metabolism	peptidase for amino acid acquistion		cytoplasm			in TS	in LS		Yes	-0.409359	-0.462579	-0.891549	0.723496	1.96691	2.70039				-0.0046196	-0.411985	-0.970008
K0N8Y4	BN194_07470	lacC	tagatose-6-phosphate kinase	LacC	Carbohydrate-related metabolism	galactose/tagatose catabolism		cytoplasm			in TS	in LS		Yes	1.1073	1.40279	3.72745	NaNa	NaN	3.09b				0.799442	1.03232	3.12942
K0N6A8	BN194_07480	lacD2	tagatose 1,6-diphosphate aldolase 2	LacD2	Carbohydrate-related metabolism	galactose/tagatose catabolism		cytoplasm			in TS	in LS		Yes	0.51761	0.667339	1.6972	NaN	NaN	2.93135				0.185385	0.0601807	2.7447
K0N7J5	BN194_26560	ldh	L-lactate dehydrogenase	Ldh	Carbohydrate-related metabolism	fermentation; end-product formation		cytoplasm		in ECF	in TS	in LS		Yes	-0.0801881	0.00133642	0.147186	1.09531	-0.00456111	0.54855	-0.539141	-0.669074	0.317039	0.129918	-0.151667	0.941694
K0N7P0	BN194_27060	lacD2_2	tagatose 1,6-diphosphate aldolase 2	LacD2	Carbohydrate-related metabolism	galactose/tagatose catabolism		cytoplasm		in ECF	in TS	in LS		Yes	0.0858288	0.156324	1.22159	1.01908	0.165017	0.708881	-0.477495	-0.630233	0.803846	0.107501	-0.901549	1.33634
K0N9X8;K0N6D6	BN194_21330;BN194_21760	spsK;spsK_2	dTDP-4-dehydrorhamnose reductase	spsK;spsK_2	Carbohydrate-related metabolism	dTDP-4-dehydrorhamnose reductase	also spore coat polysaccharide biosynthesis	cytoplasm			in TS	in LS		Yes	-0.278496	-0.317322	-0.0805518	1.0704	0.200951	0.204361				-0.04	-0.3	-0.88
K0MSP8	BN194_04740	npr	NADH peroxidase	Npr	Cell defense/detoxification	oxidative stress management		cytoplasm			in TS	in LS		Yes	0.0448653	-0.116834	0.953864	NaN	NaN	1.94478				-0.474298	-0.74177	-0.180229
K0N8U9	BN194_07170	yfeX	Dyp-type iron-dependent peroxidase	YfeX	Cell defense/detoxification	oxidative stress management		cytoplasm			in TS	in LS		Yes	-0.513151	-0.277673	-2.19027	-0.461935	-0.934914	-1.74646				-0.0646534	-1.31348	-6.12541
K0N347	BN194_08260	dkgB	2,5-diketo-D-gluconic acid reductase B	DkgB	Cell defense/detoxification	methylglyoxal removal via acetol		cytoplasm			in TS	in LS		Yes	1.0198	1.19314	2.80327	NaN	1.78841	1.72016				-0.135023	1.15136	0.734157
K0MRY4	BN194_01390	ddl	D-alanine--D-alanine ligase	Ddl	Cell wall biogenesis	late peptidoglycan biosynthesis	Also in cell membrane	cytoplasm			in TS	in LS		Yes	0.438599	0.46912	0.528382	NaN	0.166722	1.92537				0.383096	0.0110785	-0.65858
K0N1S5	BN194_02160	murE	UDP-N-acetylmuramoyl-L-alanyl-D-glutamate-2,6-diaminopimelate ligase	MurE	Cell wall biogenesis	late peptidoglycan biosynthesis	Also in cell membrane	cytoplasm			in TS	in LS		Yes	-0.167452	-0.186921	-0.345729	1.34158	1.55447	2.45278				-0.242116	-0.031215	-1.29117
K0N2R3	BN194_07350	galE	UDP-glucose 4-epimerase	GalE	Cell wall biogenesis	teichoic acid decoration		cytoplasm			in TS	in LS		Yes	-0.250684	-0.12411	-0.48687	-0.862525	-0.79249	-3.28355				-0.433731	-0.616333	0.145335
K0N7E3	BN194_12280	cap4C	UTP--glucose-1-phosphate uridylyltransferase	GalU	Cell wall biogenesis	teichoic acid decoration?, exopolysaccharide biosynthesis?	Cap4C	Cytoplasm			in TS	in LS		Yes	-0.365383	-0.322701	-0.706587	NaN	NaN	2.32004				-1.93551	-1.70992	-2.36377
K0MY10	BN194_26940	glmU	glucosamine-1-phosphate N-acetyltransferase / UDP-N-acetylglucosamine pyrophosphorylase	GlmU	Cell wall biogenesis	early peptidoglycan biosynthesis		cytoplasm			in TS	in LS		Yes	-0.123662	-0.0759125	-0.765191	NaN	0.487343	1.12127				0.0988356	-0.566346	-1.05088
K0N1M9	BN194_01710	xpkA	xylulose-5-phosphate phosphoketolase	XpaK	Central glycolytic/intermediary pathways	pentose phosphate pathway; D-xylulose catabolism		cytoplasm			in TS	in LS		Yes	1.17025	1.39001	1.64037	0.201765	4.13719	6.14654				0.254079	1.71167	2.31627
K0N2C9	BN194_05060	fba_2	fructose-bisphosphate aldolase	Fba2	Central glycolytic/intermediary pathways	glycolysis		cytoplasm			in TS	in LS		Yes	-0.74699	-0.78105	-0.473991	0.49218	0.0295982	-2.56388				0.00959524	-1.05164	1.27089
K0N3R3	BN194_11010	gap	glyceraldehyde-3-phosphate dehydrogenase	Gap	Central glycolytic/intermediary pathways	glycolysis		cytoplasm		in ECF		in LS		Yes	-0.204497	-0.139961	-0.284136	0.6	-0.2	-1.7	-0.412508	-0.801857	0.74074	0.249046	0.268891	1.70149
K0N9R1	BN194_11020	pgk	phosphoglycerate kinase	Pgk	Central glycolytic/intermediary pathways	glycolysis		cytoplasm		in ECF	in TS	in LS		Yes	0.511857	0.662278	2.15533	0.236373	0.843082	-2.15526	-1.0315	-1.04214	0.987481	0.299056	0.875507	2.57319
K0N736	BN194_11030	tpiA	triosephosphate isomerase	Tpi	Central glycolytic/intermediary pathways	glycolysis		cytoplasm		in ECF	in TS	in LS		Yes	0.630518	0.738079	1.62225	0.936138	1.15606	0.294103	NaN	NaN	0.665351	0.579625	0.807227	1.07763
K0MU67	BN194_11040	eno	enolase	Eno	Central glycolytic/intermediary pathways	glycolysis		cytoplasm		in ECF	in TS	in LS		Yes	0.240751	0.268487	0.377136	-0.186673	-0.000826518	-0.787884	-0.257918	-0.971689	0.801296	0.175581	0.436324	2.27305
K0NAK6	BN194_15570	pfkA	6-phosphofructokinase	Pfk	Central glycolytic/intermediary pathways	glycolysis		cytoplasm			in TS	in LS		Yes	-0.0500851	-0.103731	-0.279819	1.12377	1.18387	-0.106293				-0.580372	-0.409005	1.29093
K0N8B6	BN194_15580	pyk	pyruvate kinase	Pyk	Central glycolytic/intermediary pathways	glycolysis		cytoplasm		in ECF	in TS	in LS		Yes	-0.578105	-0.717911	-2.01821	-0.802833	-2.01203	-3.95775	-0.925838	-0.75081	-0.556588	0.0309149	-1.07023	-0.759837
K0N5N2	BN194_18660	gnd	6-phosphogluconate dehydrogenase	Gnd	Central glycolytic/intermediary pathways	pentose phosphate pathway		cytoplasm			in TS	in LS		Yes	0.498726	0.665689	1.12668	0.920175	0.91674	1.53401				0.00558345	0.511824	2.38518
K0MX58	BN194_22740	gpmA2	2,3-bisphosphoglycerate-dependent phosphoglycerate mutase	GpmA2	Central glycolytic/intermediary pathways	glycolysis		cytoplasm			in TS	in LS		Yes	-0.183908	0.0346985	0.142735	-0.353022	0.413605	-0.0141424				-0.0291061	-0.953111	0.989476
K0N7I6	BN194_12580;BN194_13210	pgi	Glucose-6-phosphate isomerase	Pgi	Central glycolytic/intermediary pathways			cytoplasm				in LS		Yes	-0.270192	-0.155559	-0.173288	0	1.1	1.07				0.11	-0.38	-0.84
K0MWF6	BN194_19840	nadE	NH(3)-dependent NAD(+) synthetase	NadE	Cofactor-related metabolism	NAD(P)H biosynthesis		cytoplasm			in TS	in LS		Yes	-0.278916	-0.258355	-1.53574	0.727422	-1.13099	NaN				0.0246499	-1.46585	-2.53152
K0N4K5	BN194_13650	mbl	cell-shape determining protein Mbl	Mbl	Cytokinesis	cell division; cell shape directing complex		cytoplasm			in TS	in LS		Yes	-0.227579	-0.236244	-0.762412	-1.80623	-1.57836	2.09307				-0.044995	0.0861073	-0.41191
K0N4R7	BN194_14550	mreB	rod shape-determining protein MreB	MreB	Cytokinesis	cell division; cell shape directing complex		cytoplasm			in TS	in LS		Yes	-0.264058	-0.352688	-0.884826	0.646638	0.96682	3.43073				-0.560188	-0.762152	-1.88043
K0N4L6	BN194_14760	ftsZ	cell division protein FtsZ	FtsZ	Cytokinesis	cell division; divisome complex		cytoplasm			in TS	in LS		Yes	-0.123593	-0.0460078	-0.959645	-1.13574	-2.11747	-1.11028				-0.337283	-0.678706	-1.04999
K0N4T8	BN194_14800	divIVA	septum site-determining protein DivIVA	DivIVA	Cytokinesis	cell division; divisome complex		cytoplasm			in TS	in LS		Yes	0.0374934	0.119644	-0.99585	3.70232	3.57532	0.874925				0.225943	0.45896	-0.801435
K0N8P0	BN194_27650	recA_2	DNA recombinase RecA	RecA	DNA repair/recombination	DNA repair (homologous recombination; SOS response)		cytoplasm			in TS	in LS		Yes	0.0913906	0.128036	-0.287121	0.173306	2.3505	2.51768				0.355672	0.135876	-2.53894
K0N6S3	BN194_00020	dnaN	DNA polymerase III subunit beta	DnaN	DNA replication-related	DNA replication elongation		cytoplasm			in TS	in LS		Yes	0.392553	0.470977	0.569016	NaN	NaN	2.16966				0.456006	0.18356	0.306065
K0N1B8	BN194_00060	gyrB	DNA gyrase subunit B	GyrA	DNA replication-related	DNA topological change		cytoplasm			in TS	in LS		Yes	-0.0122197	0.0225786	-0.229623	-1.04187	-1.1325	-0.748796				0.288264	-0.320394	-1.08445
K0MVF4	BN194_15740	hup	DNA-binding protein HU	Hup/Hbs	DNA replication-related	DNA topology change		cytoplasm		in ECF	in TS	in LS		Yes	0.860891	0.277877	2.00371	1.31022	1.76267	2.49777	-0.938843	-1.05727	0.464478	-0.178724	-0.196274	0.286037
K0MX40	BN194_22540	fabF	3-oxoacyl-ACP synthase I/II	FabF	Lipid-related metabolism	fatty acid biosynthesis		cytoplasm			in TS	in LS		Yes	3.80951	3.12404	0.619322	1.79389	3.27748	0.551477				-0.0504704	0.0408815	-1.65044
K0NA38	BN194_22580	fabK	enoyl-[acyl-carrier protein] reductase II	FabK	Lipid-related metabolism	fatty acid biosynthesis		cytoplasm			in TS	in LS		Yes	5.12965	4.65858	-0.185453	0.341368	0.660857	NaN				0.358063	0.602054	-3.50271
K0MX45	BN194_22590	acpP_2	acyl carrier protein	AcpP2	Lipid-related metabolism	fatty acid biosynthesis		cytoplasm			in TS	in LS		Yes	4.54276	2.93455	2.06475	0.172717	0.227388	-3.02753				-0.00709279	0.290847	-3.08455
K0N1J0	BN194_01160	purA	adenylosuccinate synthetase	PurA	Nucleic acid/nucleotide metabolism	adenosine/adenine/AMP biosynthesis		cytoplasm			in TS	in LS		Yes	0.456313	0.27501	0.714083	-0.436259	-2.03823	-3.26658				0.156281	-1.61383	-0.388473
K0N1G3	BN194_02100	guaB	inosine-5'-monophosphate dehydrogenase	GuaB	Nucleic acid/nucleotide metabolism	guanosine/guanine/GMP biosynthesis		cytoplasm			in TS	in LS		Yes	0.594588	0.458396	0.312599	0.183727	2.89885	1.3223				-0.1175	-0.594552	0.544863
K0MUR6	BN194_12490	xpt	xanthine phosphoribosyltransferase	Xpt	Nucleic acid/nucleotide metabolism	GMP biosynthesis		cytoplasm			in TS	in LS		Yes	0.157309	0.0554377	0.598697	-2.73748	-2.97559	-3.14395				-0.355373	-2.00562	-0.570871
K0N7F0	BN194_26010	adk	adenylate kinase	Adk	Nucleic acid/nucleotide metabolism	ADP biosynthesis; energy homeostasis		cytoplasm			in TS	in LS		Yes	0.135098	0.193053	0.62838	0.29679	2.13683	3.81192				0.0725269	0.00941022	0.681988
K0N9I2	BN194_19430	ptsH	phosphocarrier protein HPr	PtsH	Phosphotransferase systems	PTS general components		cytoplasm			in TS	in LS		Yes	0.581652	-0.174763	1.30277	0.999481	2.60802	4.32911				-0.417716	-1.15481	-0.946835
K0NDL4	BN194_29720	manX_5	PTS (Mannose/Fructose/Sorbose family) IIAB	ManX	Phosphotransferase systems	glucose/mannose uptake		cytoplasm			in TS	in LS		Yes	0.201223	0.26077	-2.08643	0.995205	2.52702	-0.925219				-0.147299	1.1897	-4.79034
K0N5T2	BN194_19410	ptsI	Phosphoenolpyruvate-protein phosphotransferase	ptsI	Phosphotransferase systems	ptsI		cytoplasm			in TS	in LS		Yes	-0.393843	-0.227818	-1.04254	-0.284532	-0.646619	-0.711129				0.11	-0.59	-1.3
K0ND69	BN194_27770	levE_4	PTS(mannose/Sorbose/fructose family) IIAB	LevE_4	Phosphotransferase systems	sugar uptake	levE_4	cytoplasm			in TS	in LS		Yes	1.35	2.13	5.74	NaN	NaN	2.08b				NaN	4.04	3.03b
K0NB27	BN194_17820	ffh	signal recognition particle protein	Ffh	Protein export	protein secretion; SRP pathway (trafficking)		cytoplasm			in TS	in LS		Yes	0.286542	0.440026	0.61211	NaN	NaN	2.4851				0.578222	0.460969	0.709726
K0N3M4	BN194_10510	clpP_2	ATP-dependent Clp protease proteolytic subunit	ClpP2	Protein folding/turnover	recycling defective proteins; virulence		cytoplasm			in TS	in LS		Yes	0.304569	0.407374	0.592192	0.585079	1.56895	5.49596				0.135268	-0.161297	1.07488
K0N884	BN194_15330	tig	trigger factor Tig	Tig	Protein folding/turnover	nascent protein folding	Non-classically secreted	cytoplasm		in ECF	in TS	in LS		Yes	0.258638	0.391705	-0.116615	0.41317	1.46262	1.48581	-0.780952	-1.17857	1.56126	0.117893	-0.200813	0.204954
K0N4Z8	BN194_15500	clpB	chaperone protein ClpB	ClpB	Protein folding/turnover	recycling defective proteins		cytoplasm			in TS	in LS		Yes	0.578614	0.662399	1.0312	NaN	0.688605	2.6642				-0.140447	-0.314634	1.37772
K0N4Y1	BN194_16010	hslU	ATP-dependent protease ATPase subunit HslU	HslU	Protein folding/turnover	recycling defective proteins		cytoplasm			in TS	in LS		Yes	0.458696	0.616206	0.163773	NaN	0.847766	2.01156				-0.235623	-0.257339	-0.72742
K0N5J4	BN194_17450	dnaJ	chaperone protein DnaJ	DnaJ	Protein folding/turnover	nascent protein folding	Non-classically secreted	cytoplasm			in TS	in LS		Yes	0.392944	0.555183	0.893403	2.29396	2.05598	2.40484				1.73573	2.06023	3.31927
K0N5C7	BN194_17460	dnaK	chaperone protein DnaK	DnaK	Protein folding/turnover	nascent protein folding; protein rescue	Non-classically secreted	cytoplasm		in ECF	in TS	in LS		Yes	0.485486	0.574252	0.46184	0.675322	0.881751	-0.281876	-0.455247	-1.01415	1.90265	0.634761	0.477708	1.83806
K0NAZ2	BN194_17470	grpE	molecular chaperone (heat shock protein, Hsp70 complex)	GrpE	Protein folding/turnover	nascent protein folding	Non-classically secreted	cytoplasm			in TS	in LS		Yes	0.681943	0.575295	0.44091	1.18062	0.951831	-1.05158				0.378464	-0.106524	1.70402
K0N7K7	BN194_23750	groEL	class I heat-shock protein (chaperonin) large subunit	GroEL	Protein folding/turnover	nascent protein folding		cytoplasm		in ECF	in TS	in LS		Yes	0.987304	1.0994	1.71359	0.0630887	0.711273	3.13162	-0.408282	-1.04573	1.2142	0.623021	0.578473	3.60903
K0N700	BN194_23760	groES	class I heat-shock protein (chaperonin) small subunit	GroES	Protein folding/turnover	nascent protein folding		cytoplasm		in ECF	in TS	in LS		Yes	1.00766	0.879682	1.52839	0.950301	0.372711	-0.394686	0.0397568	0.114953	1.50452	0.808105	0.60139	3.14442
K0N4W9	BN194_15150	typA	GTP-binding protein TypA/BipA	TypA/BipA	Protein translation (elongation)	protein synthesis; ribosome function		cytoplasm			in TS	in LS		Yes	-0.337083	-0.335057	-1.37348	1.0388	1.8296	1.16125				-0.160255	-0.662284	-3.05313
K0N4R1	BN194_15310	tuf	elongation factor Tu	Tuf	Protein translation (elongation)	protein synthesis; translation elongation		cytoplasm		in ECF	in TS	in LS		Yes	0.141908	0.184926	0.14758	0.804772	1.6548	1.25761	0.0545826	-0.3918	2.49811	-0.0283833	-0.0814222	1.59977
K0NB01	BN194_17670	tsf	elongation factor Ts	Tsf	Protein translation (elongation)	protein synthesis; translation elongation		cytoplasm			in TS	in LS		Yes	0.259639	0.246564	0.88918	0.813314	2.0628	2.43642				0.198237	0.468964	2.07757
K0NCN8	BN194_26270	fusA	elongation factor G	Fus	Protein translation (elongation)	protein synthesis; translation elongation		cytoplasm			in TS	in LS		Yes	-0.190212	-0.206849	-0.569887	0.40512	0.845817	2.35165				-0.0424964	-0.118966	1.07493
K0N5K7	BN194_17550	infB	translation initiation factor IF-2	InfB	Protein translation (initiation)	protein synthesis; translation initiation		cytoplasm			in TS	in LS		Yes	-0.381104	-0.443864	-1.1267	-0.451921	-1.23298	-3.47675				0.0564232	0.325589	0.0284996
K0NB73	BN194_18820	infC	translation initiation factor IF-3	InfC	Protein translation (initiation)	protein synthesis; translation initiation		cytoplasm			in TS	in LS		Yes	0.248433	0.105559	1.87256	NaN	0.0565427	2.27704				0.503544	0.845158	0.385213
K0N847	BN194_26000	infA	translation initiation factor IF-1	InfA	Protein translation (initiation)	protein synthesis; translation initiation		cytoplasm			in TS	in LS		Yes	-0.567697	-0.186655	0.281196	0.394258	1.05774	1.42576				-0.339781	-0.122259	-0.943925
K0N7F7	BN194_02070	engD	GTP-and nucleic acid- binding protein	EngD	Protein translation (peptide release)	translation attenuation?		cytoplasm			in TS	in LS		Yes	0.15382	0.343114	1.5066	-0.334454	-0.39665	0.675432				0.505406	0.609238	0.236003
K0N5M3	BN194_17650	frr	ribosome-recycling factor	Frr	Protein translation (peptide release)	protein synthesis; translation release		cytoplasm			in TS	in LS		Yes	-0.0409031	-0.237521	-0.634816	0.157498	-1.12326	-0.908669				-0.319903	-0.798453	-3.30824
K0MV63	BN194_14440	rpsD	30S ribosomal protein S4	RpsD	Ribosomal proteins	30S (SSU) ribosome		cytoplasm			in TS	in LS		Yes	-0.362804	-0.224587	-0.615248	0.421753	-0.784332	-1.33902				0.200141	0.299826	-0.26152
K0NAL9	BN194_15720	ypfD	30S ribosomal protein S1	RpsA	Ribosomal proteins	30S (SSU) ribosome		cytoplasm		in ECF	in TS	in LS		Yes	-0.115749	-0.127963	-0.154622	-0.135695	0.0444113	-0.468669	-0.761571	-1.09896	1.5276	0.0799141	0.246483	1.32383
K0N5E5	BN194_17050	rpsU	30S ribosomal protein S21	RpsU	Ribosomal proteins	30S (SSU) ribosome		cytoplasm			in TS	in LS		Yes	-0.130941	-0.152481	1.04177	-0.857475	-0.624357	0.385494				0.475836	-0.164949	-0.853386
K0N936	BN194_17680	rpsB	30S ribosomal protein S2	RpsB	Ribosomal proteins	30S (SSU) ribosome		cytoplasm		in ECF	in TS	in LS		Yes	-0.323762	-0.211211	-0.312513	0.104878	0.116365	0.440155	-0.768901	-0.624946	0.753892	0.377085	0.50332	0.906311
K0NB51	BN194_18270	rpmA	50S ribosomal protein L27	RpmA	Ribosomal proteins	50S (LSU) ribosome		cytoplasm			in TS	in LS		Yes	0.219216	-0.321726	2.27133	0.252448	0.962968	NaN				0.54214	0.643009	-1.77542
K0NA98	BN194_24080	rplL	50S ribosomal protein L7/L12	RplL	Ribosomal proteins	50S (LSU) ribosome		cytoplasm		in ECF	in TS	in LS		Yes	0.141104	-0.215188	-0.378687	-0.630578	-0.750966	-0.718898	-0.797549	-1.49749	0.348309	0.745702	0.513324	-0.181188
K0MXD8	BN194_24090	rplJ	50S ribosomal protein L10	RplJ	Ribosomal proteins	50S (LSU) ribosome		cytoplasm			in TS	in LS		Yes	-0.323996	-0.230267	-0.265504	-0.79248	2.25115	4.011				0.30379	0.650791	0.767232
K0N7M7	BN194_24150	rplA	50S ribosomal protein L1	RplA	Ribosomal proteins	50S (LSU) ribosome		cytoplasm		in ECF	in TS	in LS		Yes	-0.230061	-0.155777	0.313102	0.108759	-1.15677	0.228249	-0.309375	-0.437551	0.622438	0.183736	0.493947	-0.842659
K0N724	BN194_24160	rplK	50S ribosomal protein L11	RplK	Ribosomal proteins	50S (LSU) ribosome		cytoplasm		in ECF	in TS	in LS		Yes	-0.0670497	0.0864137	1.10466	2.32889	1.48834	1.32189	-0.627666	-0.645093	0.532562	0.212044	0.325211	-0.165549
K0N828	BN194_25850	rplM	50S ribosomal protein L13	RplM	Ribosomal proteins	50S (LSU) ribosome		cytoplasm			in TS	in LS		Yes	-0.288442	-0.137827	0.183947	0.557766	1.02065	3.14343				0.209546	0.341563	-1.03614
K0NAK7	BN194_26030	rplO	50S ribosomal protein L15	RplO	Ribosomal proteins	50S (LSU) ribosome		cytoplasm		in ECF	in TS	in LS		Yes	-0.234282	-0.13726	0.996303	0.528255	3.22346	3.807	NaN	NaN	1.53247	0.430386	0.711924	-0.110783
K0MXS6	BN194_26040	rpmD	50S ribosomal protein L30	RpmD	Ribosomal proteins	50S (LSU) ribosome		cytoplasm			in TS	in LS		Yes	0.897558	-0.216081	-0.327944	0.0360521	-0.448328	-0.197151				0.331904	0.494322	-1.12236
K0N853	BN194_26050	rpsE	30S ribosomal protein S5	RpsE	Ribosomal proteins	30S (SSU) ribosome		cytoplasm		in ECF	in TS	in LS		Yes	-0.317442	-0.340127	0.0947431	-1.10822	0.247755	0.93893	-0.360276	-0.585063	-0.368656	0.40288	0.399746	0.0382716
K0N7F4	BN194_26060	rplR	50S ribosomal protein L18	RplR	Ribosomal proteins	50S (LSU) ribosome		cytoplasm			in TS	in LS		Yes	-0.206083	-0.204627	0.37188	1.59183	0.773197	-0.309807				0.133997	0.315881	-0.62966
K0NCK5	BN194_26070	rplF	50S ribosomal protein L6	RplF	Ribosomal proteins	50S (LSU) ribosome		cytoplasm			in TS	in LS		Yes	-0.469828	-0.501703	0.758823	0.598856	-0.711868	2.85199				0.440292	0.494138	-1.03424
K0NAL1	BN194_26080	rpsH	30S ribosomal protein S8	RpsH	Ribosomal proteins	30S (SSU) ribosome		cytoplasm			in TS	in LS		Yes	-0.134988	-0.112935	-0.186146	0.0851269	0.168743	-0.756008				0.211357	0.303868	-0.371559
K0N859	BN194_26100	rplE	50S ribosomal protein L5	RplE	Ribosomal proteins	50S (LSU) ribosome		cytoplasm			in TS	in LS		Yes	-0.272526	-0.183664	-0.0629342	-0.280958	-0.66018	2.81555				0.310467	0.628637	-0.141186
K0N7F9	BN194_26110	rplX	50S ribosomal protein L24	RpsX	Ribosomal proteins	50S (LSU) ribosome		cytoplasm			in TS	in LS		Yes	-0.0930023	-0.333028	2.03878	4.34349	4.07335	1.3953				0.715441	0.752058	-0.822803
K0NCL3	BN194_26120	rplN	50S ribosomal protein L14	RplN	Ribosomal proteins	50S (LSU) ribosome		cytoplasm			in TS	in LS		Yes	-0.342309	-0.241929	0.00267474	-0.0279497	-0.934104	0.685873				0.369151	0.417239	-0.801865
K0N7G5	BN194_26160	rpsC	30S ribosomal protein S3	RpsC	Ribosomal proteins	30S (SSU) ribosome		cytoplasm			in TS	in LS		Yes	-0.141198	-0.325975	-0.464429	-0.323726	-1.17644	-1.54487				0.27112	0.171493	-0.49224
K0NCM1	BN194_26170	rplV	50S ribosomal protein L22	RplV	Ribosomal proteins	50S (LSU) ribosome		cytoplasm			in TS	in LS		Yes	-0.500025	-0.31959	-0.0617402	-1.62275	1.84881	1.52737				0.335561	0.535288	-0.300978
K0NAM1	BN194_26180	rpsS	30S ribosomal protein S19	RpsS	Ribosomal proteins	30S (SSU) ribosome		cytoplasm			in TS	in LS		Yes	-0.467974	-0.356404	0.661962	NaN	-0.494877	1.878				0.229173	0.394983	-0.588865
K0N869	BN194_26200	rplW	50S ribosomal protein L23	RplW	Ribosomal proteins	50S (LSU) ribosome		cytoplasm			in TS	in LS		Yes	-0.23048	-0.288055	1.30859	-0.0369015	1.3385	5.41341				0.721706	0.968481	-0.0949332
K0NCN1	BN194_26220	rplC	50S ribosomal protein L3	RplC	Ribosomal proteins	50S (LSU) ribosome		cytoplasm			in TS	in LS		Yes	-0.218323	-0.224003	-0.592621	0.185008	-0.774953	0.335482				0.205843	0.366587	-0.53576
K0NAM5	BN194_26230	rpsJ	30S ribosomal protein S10	RpsJ	Ribosomal proteins	30S (SSU) ribosome		cytoplasm		in ECF	in TS	in LS		Yes	-0.342566	-0.170787	-0.680065	0.146473	-1.58617	0.940415	-0.76752	-0.650355	0.573863	0.302802	0.609917	-0.538785
K0NAM9	BN194_26280	rpsG	30S ribosomal protein S7	RpsG	Ribosomal proteins	30S (SSU) ribosome		cytoplasm			in TS	in LS		Yes	-0.353167	-0.33535	0.911954	-0.945206	-1.79867	0.93885				0.23267	0.430834	-0.250137
K0MXV0	BN194_26290	rpsL	30S ribosomal protein S12	RplL	Ribosomal proteins	30S (SSU) ribosome		cytoplasm			in TS	in LS		Yes	-0.208044	-0.101594	-0.556698	0.4325	-0.0278536	-0.676706				0.40325	0.758447	0.1763
K0NCV4	BN194_26770	rpmE2	50S ribosomal protein L31	RpmE	Ribosomal proteins	50S (LSU) ribosome		cytoplasm			in TS	in LS		Yes	-0.48226	0.0687491	0.860992	NaN	0.242791	NaN				0.484745	0.633651	-1.01276
K0N309	BN194_08450	nrnA	bifunctional oligoribonuclease and PAP phosphatase nrnA	NrnA	RNA degradation	RNA degradation (nanoRNA)		cytoplasm			in TS	in LS		Yes	0.04271	0.0624962	0.835943	1.15473	0.724483	2.82746				0.0313021	0.208931	-0.495311
K0MVC2	BN194_15290	rnjB	ribonuclease J2	RnjB	RNA degradation	RNA degradation (degradosome)		cytoplasm			in TS	in LS		Yes	0.173457	-0.0189158	-0.152306	NaN	NaN	2.57943				-0.184921	1.06578	1.57442
K0NAV6	BN194_16920	rpoD	RNA polymerase sigma factor A	RpoD/SigA	RNA polymerase			cytoplasm			in TS	in LS		Yes	0.114908	0.150264	0.232154	-2.65443	-2.07563	0.545367				1.05527	0.551007	1.13748
K0N7E5	BN194_25960	rpoA	DNA-directed RNA polymerase subunit alpha	RpoA	RNA polymerase	RNA polymerase		cytoplasm			in TS	in LS		Yes	-0.135719	-0.140836	-0.026872	0.846268	1.79046	3.03523				0.180473	0.203908	1.55474
K0NAN3	BN194_26330	rpoC	DNA-directed RNA polymerase subunit beta'	RpoC	RNA polymerase	RNA polymerase		cytoplasm			in TS	in LS		Yes	-0.280199	-0.273076	-0.554787	-1.43834	-1.57573	0.034043				0.165228	-0.0406431	-0.401738
K0MXV4	BN194_26340	rpoB	DNA-directed RNA polymerase subunit beta	RpoB	RNA polymerase	RNA polymerase		cytoplasm			in TS	in LS		Yes	-0.349518	-0.24096	-0.75407	0.600855	-0.615318	2.07378				0.138728	-0.0896371	-0.540269
K0N7L4	BN194_26810	rpoE	DNA-directed RNA polymerase subunit delta	RpoE	RNA polymerase	RNA polymerase		cytoplasm			in TS	in LS		Yes	0.255761	0.16121	1.23708	NaN	NaN	2.10246				0.249381	0.191657	1.31436
K0N323	BN194_08750	ccpA	catabolite control protein A	CcpA	Transcriptional regulation	regulation of catabolic enzyme coding genes		cytoplasm			in TS	in LS		Yes	0.142161	0.125041	-0.0692164	-1.23288	0.609039	-0.927565				0.0843983	-0.441221	0.723304
K0N3Z3	BN194_11600	BN194_11600	DNA-binding regulatory protein, YebC/PmpR family	BN194_11600	Transcriptional regulation	regulatory role (unknown)		cytoplasm			in TS	in LS		Yes	0.129156	-0.148504	0.900756	-1.60763	-1.44705	-3.69923				-0.100226	-1.2473	-0.661378
K0N7M9	BN194_26960	purR_2	Pur operon repressor	PurR2	Transcriptional regulation	regulation of purine biosynthesis genes		cytoplasm			in TS	in LS		Yes	0.187553	-0.045578	-0.117842	NaN	0.628941	-1.17625				-0.274988	-1.64252	-1.56791
K0N927	BN194_17580	nusA	transcription elongation protein NusA	NusA	Transcription-associated proteins	transcription elongation		cytoplasm			in TS	in LS		Yes	-0.14683	-0.0926374	-0.402444	0.798111	0.329666	-1.47278				-0.0991713	-0.530201	0.27883
K0NB62	BN194_18520	greA	transcription elongation factor GreA	GreA	Transcription-associated proteins	transcription elongation		cytoplasm			in TS	in LS		Yes	0.415579	0.270382	1.48864	0.416361	0.852766	NaN				0.107313	-0.569482	-1.71198
K0N730	BN194_24260	nusG	transcription antitermination protein NusG	NusG	Transcription-associated proteins	transcription antitermination		cytoplasm			in TS	in LS		Yes	0.0658506	-0.0500043	0.982993	NaN	NaN	1.57032				0.0904598	-0.636675	0.0987021
K0N6K2	BN194_08480	alaS	alanine--tRNA ligase	AlaS	tRNA aminoacyl synthesis	protein synthesis; tRNA charging		cytoplasm			in TS	in LS		Yes	-0.164114	-0.0975196	-0.934259	-0.0435247	0.0125367	1.91961				-0.106129	-0.785954	-1.2943
K0N3Z6	BN194_11960	gatA	glutamyl-tRNA(Gln) amidotransferase subunit A	GatA	tRNA aminoacyl synthesis	protein synthesis; tRNA charging		cytoplasm			in TS	in LS		Yes	-0.13535	-0.0539366	-1.19614	0.126769	0.236765	-0.173348				0.0300528	-0.746914	-1.42339
K0N5D3	BN194_16950	glyS	glycine--tRNA ligase subunit beta	GlyS	tRNA aminoacyl synthesis	protein synthesis; tRNA charging		cytoplasm			in TS	in LS		Yes	-0.0963929	-0.051431	-1.1367	NaN	NaN	0.564341				0.0636927	-0.178256	-2.0115
K0N5P5	BN194_18860	thrS	threonine--tRNA ligase	ThrS	tRNA aminoacyl synthesis	protein synthesis; tRNA charging		cytoplasm			in TS	in LS		Yes	-0.109587	0.00661532	-0.871241	-0.0968615	1.17054	NaN				-0.390125	-0.521777	-0.751097
K0NAN7	BN194_26380	lysS	lysine--tRNA ligase	LysS	tRNA aminoacyl synthesis	protein synthesis; tRNA charging		cytoplasm			in TS	in LS		Yes	-0.362586	-0.30929	-1.04584	0.19712	0.402066	-1.84113				-0.0226377	-1.15688	-1.15728
K0N3F2	BN194_10150	BN194_10150	ribosome-associated sigma 54 modulation protein	Hpf	tRNA/Ribosome assembly/processing			cytoplasm			in TS	in LS		Yes	0.0976652	0.109993	-0.791389	-0.26001	-0.673782	0.0614748				-0.100918	0.225809	-1.9867
K0MVH2	BN194_15940	rbgA	ribosome biogenesis GTPase A	RbgA	tRNA/Ribosome assembly/processing	ribosome processing		cytoplasm			in TS	in LS		Yes	0.21576	0.413374	1.72566	NaN	NaN	1.30684				0.725049	1.19548	0.675797
K0N8A7	BN194_26500	yabR	RNA binding protein, S1_like superfamily	YabR	tRNA/Ribosome assembly/processing	unknown ribosome-associated function		cytoplasm			in TS	in LS		Yes	0.1555	0.0871449	0.624346	0.469892	-1.12851	-2.93731				0.368734	-1.08223	-1.48132
K0N8C7	BN194_26700	cshA	DEAD/DEAH box helicase	CshA	tRNA/Ribosome assembly/processing	ribosome processing (LSU); RNA chaperone		cytoplasm			in TS	in LS		Yes	-0.71375	-0.594244	-1.32518	-0.299426	-1.66994	-2.13582				0.456725	-1.09166	-0.519102
K0N2T7	BN194_07060	BN194_07060	DUF3800 superfamily protein	BN194_07060	Unknown/uncharacterized	unknown function		cytoplasm			in TS	in LS		Yes	-0.947852	-1.04991	-2.14539	1.36516	0.454159	NaN				0.105728	-3.41071	-3.72986
K0N9L7	BN194_10470	BN194_10470	P-loop-containing ATPase family protein	BN194_10470	ABC-type transporter systems		ALSO CYTOPLASM	cell membrane				in LS			0.289507	0.426662	0.354298							0.447196	0.329379	1.14119
K0NAW2	BN194_17020	phoH	PhoH superfamily protein	PhoH	ABC-type transporter systems		ALSO CYTOPLASM	cell membrane				in LS			-0.777906	NaN	-1.10522							-0.92104	-1.131	-0.899786
K0N9L1	BN194_19780	phnC	phosphonates import ATP-binding protein PhnC	phnC	ABC-type transporter systems		ATPase-coupled organic phosphonate transmembrane transporter activity	cell membrane				in LS			-0.177228	-0.127671	0.619318							0.165542	2.99445	1.01635
K0NA88	BN194_23830	ydiF	ATP-binding protein, P-Loop NTPAse superfamily	YdiF	ABC-type transporter systems		Uncharacterized ABC transporter ATP-binding protein	cell membrane				in LS			-0.435535	-0.336198	NaN							-0.202076	-1.07497	-2.35333
K0MXC9	BN194_23890	folT	DUF3816 super family membrane protein	FolT	ABC-type transporter systems	membrane-spanning S (specificity) component of ECF (energy coupling factor) transporters	Folate transporter FolT	transmembrane				in LS			0.600531	0.0513089	NaN							0.345269	0.783281	-2.42974
K0N4E4	BN194_00680	opuCA	glycine betaine/carnitine/choline ABC-type transporter, ATP-binding protein	OpuCA	ABC-type transporter systems	carnitine/choline/glycine betaine uptake		cell membrane			in TS	in LS			0.309978	0.275012	0.821994	NaN	NaN	2.40125				0.273389	2.11264	2.39945
K0MSD4	BN194_02890	ugpB	sugar/glycerol-3-phosphate uptake ABC-type transporter, substrate-binding protein	UgpB	ABC-type transporter systems		ALSO extracellular	cell membrane	GTA-TK (29-30)			in LS	Lipo		-0.49511	-0.606797	-0.401229							-0.323556	-0.20622	0.589023
K0N2J7	BN194_06850	nodI	ABC-type transporter, ATP-binding component	nodI	ABC-type transporter systems			cell membrane				in LS			-0.447862	-0.387007	-1.00319							-0.112574	1.06553	0.926212
K0MT56	BN194_06890	yfiB	multidrug ABC-type transporter permease/ATP-binding components	yfiB	ABC-type transporter systems			transmembrane				in LS			0.0895513	0.254213	-0.200761							0.16585	3.32398	2.86957
K0N8V6	BN194_07220	ykpA	ABC transporter ATP-binding protein YkpA	YkpA	ABC-type transporter systems			cell membrane				in LS			-0.624959	-0.664708	-2.41525							-0.43294	-1.87006	-5.89211
K0N2V5	BN194_07700	BN194_07700	ABC-type transporter, substrate-binding protein	BN194_07700	ABC-type transporter systems	unknown transport		extracellular	SNA-AS (28-29)		in TS	in LS	Lipo		-0.15018	-0.204574	-0.342021	1.19249	-1.04278	-3.13491				0.623946	-0.0443242	-0.600217
K0N2Z3	BN194_07710	BN194_07710	ABC-type transporter, substrate-binding protein	BN194_07710	ABC-type transporter systems	unknown transport		extracellular	SAA-AD (29-30)	in ECF	in TS	in LS	Lipo		-1.01077	-1.1033	-3.4024	0.454381	-1.42845	-3.68162	-0.576292	2.31932	NaN	0.305656	-0.493673	-0.407923
K0N6C9	BN194_07730	BN194_07730	ABC transporter, ATP-binding component	BN194_07730	ABC-type transporter systems	unknown transport		cell membrane			in TS	in LS			-1.37974	-1.3252	-5.24853	-2.08564	-3.16952	-3.70576				-0.121246	-0.404998	-2.79423
K0N3T6	BN194_11260	ugpB	glycerol-3-phosphate ABC transporter substrate-binding protein	UgpB	ABC-type transporter systems	sugar/glycerol uptake		extracellular	SNS-SS (29-30)		in TS	in LS	Lipo		-0.210739	-0.207104	-0.977422	-0.0347163	-0.698425	-0.501237				0.262644	0.87938	-0.0369644
K0MU90	BN194_11290	potA	spermidine/putrescine import ATP-binding protein PotA	PotA	ABC-type transporter systems			cell membrane				in LS			-0.16607	-0.200562	-0.465586							-0.248135	0.666224	-1.17455
K0N765	BN194_11430	potA_2	polyamine ABC-type transporter, ATP binding protein	PotA_2	ABC-type transporter systems			cell membrane				in LS			0.962287	1.0372	1.21662							-0.0706298	2.55915	1.5674
K0N3U9	BN194_11460	potD	polyamine ABC-type transporter, substrate binding protein	PotD	ABC-type transporter systems			extracellular	SQG-DT (30-31)			in LS			0.860135	0.915147	1.22312							0.220217	3.4665	1.02857
K0N7S2	BN194_13430	BN194_13430	exporting ABC transporter, permease/ATP-binding components	BN194_13430	ABC-type transporter systems			transmembrane				in LS			0.358955	0.625548	1.82666							0.0491556	1.52049	1.55324
K0MV23	BN194_13740	metQ_2	DL-methionine uptake ABC transporter, substrate binding protein	metQ_2	ABC-type transporter systems			cell wall	KSA-SS (27-28)			in LS	Lipo		0.0484034	0.0775013	-1.1681							0.563592	3.77732	2.48466
K0NAD1	BN194_14020	dppE_3	oligopeptide ABC transporter, substrate binding protein	OppA/DppE_3	ABC-type transporter systems			cell membrane				in LS	Lipo		1.27328	1.17649	0.462475							0.740177	5.02873	-1.56448
K0MVD0	BN194_15390	glnQ_2	polar amino acid ABC-type transporter, ATP-binding protein	GlnQ_2	ABC-type transporter systems			cell membrane				in LS			0.620068	0.793632	2.01804							-0.592673	1.36097	1.61987
K0MVF8	BN194_15790	yfmR	ABC transporter, fused membrane/ATP-binding components	YfmR	ABC-type transporter systems			cell membrane				in LS			-0.29936	-0.472237	-0.47632							-0.321479	-0.704721	-1.19404
K0N983	BN194_17880	oppA	oligopeptide-binding protein OppA	OppA	ABC-type transporter systems	oligopeptide uptake		cell membrane	ANK-AV (37-38)	in ECF	in TS	in LS	Lipo		-0.564047	-0.581029	-1.27071	0.0419839	0.326921	-4.79529	1.13779	1.22341	NaN	0.207188	1.83792	0.276211
K0MW34	BN194_17890	oppC	oligopeptide transport system permease OppC	OppC	ABC-type transporter systems			transmembrane				in LS			-0.296721	-0.433697	-0.752853							0.414363	2.61458	1.52992
K0N5I3	BN194_17910	oppF	oligopeptide transport ATP-binding protein OppF	OppF	ABC-type transporter systems			cell membrane				in LS			-0.276754	-0.163295	-0.988242							0.207385	1.57005	0.927334
K0NB35	BN194_17920	oppD	oligopeptide transport ATP-binding protein OppD	OppD	ABC-type transporter systems	oligopeptide uptake		cell membrane				in LS			-0.373796	-0.330854	-0.849278							0.0101115	1.21796	1.46284
K0N670	BN194_19800	BN194_19800	ABC-type transporter, substrate-binding protein	BN194_19800	ABC-type transporter systems			extracellular				in LS			0.0101	0.108637	0.0262419							0.196474	4.0469	1.64184
K0MWL1	BN194_20590	oppF_2	oligopeptide ABC-type transporter, ATP-binding protein	OppF2	ABC-type transporter systems			cell membrane				in LS			-0.579964	-0.408701	NaN							-0.428789	-1.33355	-5.01422
K0N6C6	BN194_20600	oppD_2	oligopeptide ABC-type transporter ATP-binding protein	OppD2	ABC-type transporter systems			cell membrane				in LS			-0.700592	-0.511846	-4.21031							0.20715	-1.13193	-4.21728
K0MWL6	BN194_20640	oppA_2	oligopeptide ABC-type transporter, substrate-binding protein	OppA2	ABC-type transporter systems	oligopeptide uptake		cell membrane		in ECF	in TS	in LS	Lipo		-1.28863	-1.39691	-4.7623	-0.847064	-3.73954	-6.55402	NaN	NaN	0	-0.158479	-2.92003	-7.39065
K0NBK2	BN194_21220	BN194_21220	antimicrobial peptide ABC-type exporter, permease component	BN194_21220	ABC-type transporter systems	antimicrobial peptide export?		cell membrane			in TS	in LS			-0.395916	-0.330145	NaN	-0.665096	-0.512586	NaN				-0.0476068	1.51858	3.89828
K0N9X1	BN194_21230	bceA_2	antimicrobial peptide ABC-type exporter, ATP-binding protein	bceA_2	ABC-type transporter systems		Bacitracin export ATP-binding protein BceA	cell membrane				in LS			-0.24419	-0.260036	-1.59883							-0.409155	0.369354	3.02819
K0N9Y4	BN194_21430	glnH	polar amino acid ABC-type exporter, substrate-binding protein	GlnH	ABC-type transporter systems		ALSO cytoplasm	cell membrane	ADR-DI (31-32)			in LS	Lipo		0.100559	0.145197	0.364738							-0.182721	2.79351	1.50281
K0MWS9	BN194_21440	glnQ_3	polar amino acid ABC-type exporter, ATP-binding protein	GlnQ3	ABC-type transporter systems	polar amino acid uptake		cell membrane			in TS	in LS			0.145811	0.134417	1.4225	NaN	-0.715303	1.97293				-0.531587	2.26927	1.11251
K0NBQ1	BN194_22020	dppE_4	oligopeptide uptake ABC-type transporter, substrate-binding protein	dppE_4	ABC-type transporter systems			cell membrane	SSS-SS (35-36)			in LS	Lipo		-2.55538	-2.70784	-2.11829							-0.998229	0.752825	-1.26699
K0NAI1	BN194_25680	phnD	phosphonate ABC transporter substrate-binding protein	PhnD	ABC-type transporter systems	phosphonate uptake		cell membrane	SKS-SS(27-28)			in LS	Lipo		0.894473	0.982668	-0.428913							0.290841	0.420109	-0.233275
K0N8H4	BN194_29810	BN194_29810	sugar/glycerol-3-phosphate uptake ABC-type importer, substrate-binding protein	BN194_29810	ABC-type transporter systems			extracellular	SSA-QK (41-42)			in LS	Lipo		0.129553	0.122423	-1.00382							0.394965	1.91302	-1.79888
K0N971	BN194_29900	glnQ_4	polar amino acid ABC-type importer, ATP-binding protein	GlnQ4	ABC-type transporter systems	polar amino acid uptake		cell membrane			in TS	in LS			-0.00290489	-0.207813	-0.189261	-0.0288706	1.03172	1.83045				-0.019701	1.24337	0.754181
K0N8I1	BN194_29910	glnH_2	polar amino acid ABC-type importer, permease component	glnH_2	ABC-type transporter systems			transmembrane				in LS			-0.372547	-0.350809	-0.316298							0.13715	1.63426	1.3573
K0NDN0	BN194_29920	glnH_3	polar amino acid ABC-type importer, permease component	GlnH_3	ABC-type transporter systems			transmembrane	TQA-AE (29-30)			in LS			0.0760015	0.0417824	-0.237704							0.764507	2.37823	1.36787
K0MV08	BN194_13440	BN194_13440	exporting ABC transporter, permease/ATP-binding components	BN194_13440	ABC-type transporter systems	glucan-like efflux/export?		cell membrane			in TS	in LS			0.434321	0.80393	1.8477	NaN	NaN	1.40b				NaN	2.48b	2.35b
K0N1D1	BN194_00260	BN194_00260	ABC transporter ATP-binding protein SalY-like	BN194_00260	ABC-type transporter systems			cell membrane				in LS			0.69223	0.363412	1.0291
K0N6Z3	BN194_00670	opuCC	glycine betaine/carnitine/choline ABC-type transporter, substrate-binding protein	OpuCC	ABC-type transporter systems	carnitine/choline/glycine betaine uptake		cell membrane				in LS	Lipo		0.270831	0.150692	0.249586
K0N574	BN194_02630	yfmM	ATP-binding protein, P-Loop NTPAse superfamily	YfmM	ABC-type transporter systems	unknown function	Uncharacterized ABC transporter ATP-binding protein YfmM	cell membrane				in LS			-1.59375	-1.51931	-1.76084
K0MTZ5	BN194_10240	pstS1	phosphate ABC-type transporter, substrate binding protein	PstS	ABC-type transporter systems	phosphate uptake		cell membrane	SNS-QQ (24-25)			in LS	Lipo		-0.254798	-0.131366	-0.451209
K0N9K1	BN194_10270	pstB1	phosphate ABC-type transporter, ATP binding protein	PstBA	ABC-type transporter systems	phosphate uptake		cell membrane				in LS			-0.814263	-0.886158	-1.06609							0.831019	1.14573	0.184678
K0N6X8	BN194_10280	pstB2	phosphate ABC-type transporter, ATP binding protein	PstBB	ABC-type transporter systems	phosphate uptake		cell membrane				in LS			-0.700772	-0.81211	-1.32228
K0N3U2	BN194_11360	yhaQ	Na+ efflux ATP-typetransporter, ATP-binding component	yhaQ	ABC-type transporter systems			cell membrane				in LS			-0.0192509	0.0796947	-2.07724							1.66526	3.24694	NaN
K0N4L1	BN194_13750	metN	DL-methionine uptake ABC transporter, ATP-binding protein	MetN	ABC-type transporter systems			cell membrane				in LS			-0.504153	-0.62346	-0.970198							NaN	1.44134	NaN
K0N4K4	BN194_14610	glnQ	polar amino-acid ABC-type importer, ATP-binding protein	GlnQ	ABC-type transporter systems	polar amino acid uptake		cell membrane				in LS			-0.283601	-0.32281	-2.39287
K0N891	BN194_15380	yecS_2	polar amino acid ABC-type transporter, substrate-binding/permease components	YecS	ABC-type transporter systems	polar amino acid uptake		cell membrane	VHA-DD (28-29)			in LS			0.3186	0.372086	1.23892
K0N5S3	BN194_17900	oppB	oligopeptide transport system permease OppB	OppB	ABC-type transporter systems	oligopeptide uptake		transmembrane				in LS			-0.262316	-0.20785	-1.06995
K0MWG2	BN194_19940	BN194_19940	antimicrobial peptide ABC-type exporter, ATP-binding/permease components	BN194_19940	ABC-type transporter systems	antimicrobial peptide efflux?		cell membrane				in LS			-0.688709	-0.660743	-0.891989
K0NBH0	BN194_20620	oppC_2	oligopeptide ABC-type transporter system permease	OppC2	ABC-type transporter systems	oligopeptide uptake		transmembrane				in LS			-1.01042	-1.0003	NaN
K0N9S5	BN194_20630	oppB_2	oligopeptide ABC-type transporter system permease	OppB2	ABC-type transporter systems	oligopeptide uptake		transmembrane	ALS-AQ (39-40)			in LS			-0.855968	-0.960889	NaN							-0.351043	-0.332111	-2.13119
K0N7F2	BN194_22850	opuAA	Glycine betaine transport ATP-binding protein	OpuAA	ABC-type transporter systems	glycine betaine uptake		cell membrane				in LS			-1.45077	-1.19755	-1.20812
K0N7Y2	BN194_25450	fimA	Mn/Zn ABC transporter substrate-binding protein	FimA	ABC-type transporter systems	Mn/Zn ion uptake		transmembrane	SHR-SR (13-14)			in LS			-4.09704	-4.70206	-3.82753
K0N7A8	BN194_25460	mntB	Mn/Zn ABC transporter ATP-binding protein	MntB	ABC-type transporter systems			cell membrane				in LS			-3.22423	-3.21622	NaN							0.391116	-0.77977	-1.31618
K0N7B2	BN194_25510	BN194_25510	metal ion ABC transporter substrate-binding protein	BN194_25510	ABC-type transporter systems	metal ion uptake		cell membrane	SNG-AA (25-26)			in LS	Lipo		0.161154	0.57141	1.11365
K0MXP5	BN194_25690	phnC_2	phosphonate ABC transporter ATP-binding protein	PhnC_2	ABC-type transporter systems			cell membrane				in LS			1.01161	0.98373	-0.866975							0.482564	1.19846	-0.877265
K0NCH8	BN194_25870	BN194_25870	multidrug efflux ABC transporter, permease component	BN194_25870	ABC-type transporter systems	unknown transport		transmembrane				in LS			3.9288	4.16089	1.52017
K0NAJ5	BN194_25880	hrtA_2	multidrug efflux ABC transporter ATP-binding protein	HrtA_2	ABC-type transporter systems	toxic substance efflux?	Putative hemin import ATP-binding protein	cell membrane				in LS			2.2	3.4	1.5b
K0NCI4	BN194_25920	cbiO	cobalt/nickel ion uptake ABC transporter, ATP binding protein	CbiO	ABC-type transporter systems	cobalt/nickel uptake	Energy-coupling factor ecfA	cell membrane				in LS			0.0178045	0.0587025	-0.302554
K0NCW8	BN194_26970	ybbL	ABC-type transporter, ATP-binding protein	YbbL	ABC-type transporter systems	unknown transport		cell membrane				in LS			-0.208261	-0.133286	0.237259
K0MT82	BN194_07140	ybjQ	YbjQ_1 superfamily protein	YbjQ	ABC-type transporter systems?			extracellular				in LS			-0.0172211	0.268482	-0.719088							0.430121	0.243554	1.36665
K0N981	BN194_08670	ykuL	CBS_pair superfamily protein	YkuL	Amino acid-related metabolism		Cystathionine beta-synthase (CBS) domain protein	cell membrane				in LS			-0.144075	0.0969149	-1.13141							-0.425558	-0.93754	-4.57338
K0N4M6	BN194_14910	lp2179-like	DUF1831 superfamily protein	Lp2179-like	Amino acid-related metabolism			extracellular				in LS			0.291231	0.196573	-1.9021							-0.0825691	0.0907771	-5.50366
K0N7J7	BN194_26610	BN194_26610	CBS pair domain superfamily protein	BN194_26610	Amino acid-related metabolism			cell membrane				in LS			0.0198402	-0.310444	1.48201							-0.143227	0.87792	1.33096
K0N948	BN194_29650	ycaC	YcaC related amidohydrolase family protein	ycaC	Carbohydrate-related metabolism			extracellular				in LS			0.590096	0.669387	2.34653							0.139186	1.15104	1.69418
K0N4B3	BN194_00330;BN194_00970	ybfG;ybfG_2	Glycoside_hydrolase_domain	ybfG;ybfG_2	Carbohydrate-related metabolism	Glycoside_hydrolase_domain		extracellular				in LS			-1.20588	-1.44881	-1.92771							-0.11	-0.34	-2.45
K0MV00	BN194_13290	BN194_13290	glycosyltransferase	BN194_13290	Carbohydrate-related metabolism	unknown function	Glycosyltransferase	cell membrane				in LS			0.0138048	0.255554	4.17335
K0NBK6	BN194_21320	BN194_21320	peptidase C39_like family protein	BN194_21320	Carbohydrate-related metabolism	unknown function	Glycosyl hydrolase family 2, sugar binding domain protein	transmembrane	Yes			in LS			-0.306277	0.316055	-1.29277
K0N8Q2	BN194_27750	BN194_27750	Glycoside_hydrolase_domain	BN194_27750	Carbohydrate-related metabolism	Glycoside_hydrolase_domain	alpha-L-fucosidase activity	extracellular				in LS			-1.3	-1.1	6.5b							-1.78863	1.76645	9.04b
K0N7Z0	BN194_27760	BN194_27760	Glycoside_hydrolase_domain	BN194_27760	Carbohydrate-related metabolism	Glycoside_hydrolase_domain	alpha-L-fucosidase activity	extracellular				in LS			NaN	NaN	3.3b							NaN	-0.56	5.74b
K0N2B8	BN194_04910	BN194_04910	penicillin acylase family protein	BN194_04910	Cell defense/detoxification			extracellular				in LS			0.168555	0.107235	1.31062							0.194612	-1.02175	0.745571
K0N6T6	BN194_09780	gpo	glutathione peroxidase	Gpo	Cell defense/detoxification			extracellular				in LS			0.699782	0.367217	1.89793							-0.00555738	-0.603591	-0.535562
K0N7A4	BN194_25410	mco	multicopper oxidase	Mco	Cell defense/detoxification			extracellular				in LS			-0.635077	-0.64808	0.21282							-0.543427	-0.719568	-0.776155
K0MVK5	BN194_16340	yloA	fibrinogen/fibronectin(RNA)-binding protein FpbA	YloA	Cell surface proteins/internalins			cell membrane				in LS			-0.119467	-0.268061	-0.733385							0.322659	-0.00598717	-1.6288
K0MSU3	BN194_05290	BN194_05290	cell wall LPTXG motif anchor domain-containing protein	BN194_05290	Cell surface proteins/internalins	unknown function	extracellular, transmembrane	cell wall	VQA-DT (33 34)	in ECF		in LS			1.63573	0.00152397	-0.578026				0.0337569	-0.421317	-0.90005
K0N5Y7	BN194_20060	BN194_20060	cell-wall protein with surface anchor repeat	BN194_20060	Cell surface proteins/internalins			extracellular				in LS			0.570055	0.504165	1.14035							-0.170451	-1.83029	-2.30427
K0MS53	BN194_02140	dacA	D-alanyl-D-alanine carboxypeptidase dacA	DacA	Cell wall biogenesis	late peptidoglycan biosynthesis		cell membrane	VSA-AE (39-30)		in TS	in LS			-0.621785	-0.777985	-1.94342	-0.0687822	-0.746285	-1.92521				-0.121485	0.89605	-1.09123
K0N1U1	BN194_02360	BN194_02360	teichoic acid polymerase, putative	BN194_02360	Cell wall biogenesis	teichoic acid biosynthesis		transmembrane			in TS	in LS			-0.25031	-0.116325	-0.4262	0.487504	0.181819	-2.38635				1.36414	1.54408	1.07245
K0N7L2	BN194_02420	BN194_02420	glycosyltransferase family protein	BN194_02420	Cell wall biogenesis		ALSO in extracellular	cell membrane				in LS			-0.187737	-0.205772	-1.26382							0.684067	1.27669	-0.129063
K0N547	BN194_02430	BN194_02430	peptidoglycan autolysin	BN194_02430	Cell wall biogenesis	peptidoglycan turnover	Alternansucrase, peptidoglycan catabolic process, lysozyme activity	transmembrane	VYA-GT (36-37)	in ECF	in TS	in LS			2.44326	2.56239	-1.82135	1.7128	2.20547	-3.09433	1.9029	1.52414	-0.879272	0.613874	2.83083	-1.24862
K0N361	BN194_08610	dltC	D-alanine-poly(phosphoribitol) ligase subunit 2	DltC	Cell wall biogenesis	lipoteichoic acid biosynthetic process	cell wall organization	cell membrane				in LS			1.14037	-0.617478	-0.725522							0.0186437	0.335845	0.960725
K0N399	BN194_09110	ltaS1	exported glycerolphosphate lipoteichoic acid synthetase	LtsA1	Cell wall biogenesis			transmembrane				in LS			-0.241304	-0.200445	-1.04956							0.00514094	2.34988	0.126551
K0NAU3	BN194_16720	ponA	peptidoglycan glycosyltransferase	PonA	Cell wall biogenesis	cell division; divisome complex; peptidoglycan polymerization		cell membrane			in TS	in LS			0.00426801	-0.00619952	-1.41701	0.473756	0.913686	-1.36415				-0.0463314	1.17589	-1.82978
K0N6S2	BN194_21500	BN194_21500	cell wall-associated hydrolase, NlpC/P60 family	BN194_21500	Cell wall biogenesis	peptidoglycan turnover		extracellular	VKA-DD (42-43)	in ECF	in TS	in LS			0.573729	0.556596	0.066253	3.12732	5.48391	0.527334	1.31817	1.48778	-0.383922	0.124331	1.17088	0.309191
K0MWX1	BN194_21890	BN194_21890	capsular exopolysaccharide family protein	BN194_21890	Cell wall biogenesis		extracellular polysaccharide biosynthetic process, CAN be found in cytoplasm	cell membrane				in LS			-0.521505	-0.518347	-1.81427							-0.254457	1.36911	-1.10744
K0NA48	BN194_22780	BN194_22780	sortase family protein	BN194_22780	Cell wall biogenesis	cell wall protein sorting/binding	Sortase	transmembrane			in TS	in LS			0.526531	0.432522	1.14014	0.0294549	0.0642891	-1.60132				0.625821	3.33859	1.49411
K0MRM8	BN194_00240	BN194_00240	cell wall protein with CHAP domain	BN194_00240	cell wall biogenesis	unknown function	cell wall protein with CHAP domain /probable peptidoglycan hydrolysis	extracellular	VFA-DT (36-37)	in ECF	in TS	in LS			1.26993	1.18401	1.06077	3.90954	6.29312	4.3419	1.17976	1.46297	-0.899021	-0.169055	3.07327	1.87117
K0N7L7	BN194_02470	BN194_02470	hypothetical protein BN194_02470	BN194_02470	Cell wall biogenesis		ALSO extracellular, Capsular biosynthesis protein CpsH	cell membrane				in LS			0.0126699	0.0293802	-0.398053							-0.211109	1.63729	-0.0103544
K0N527	BN194_15850	BN194_15850	DUF2140 superfamily protein	BN194_15850	Cell wall biogenesis		hydrolase	transmembrane				in LS			0.13802	0.0766265	0.0584965							0.216484	3.35619	2.58579
K0N5W7	BN194_18550	yrrL	YceG_like superfamily protein	YrrL	Cell wall biogenesis		Endolytic murein transglycosylase, TRANSMEMBRANE	cell membrane				in LS			-0.0747363	0.0558758	-0.673562							0.405485	2.03668	1.23458
K0NA78	BN194_23630	BN194_23630	hypothetical protein BN194_23630	BN194_23630	Cell wall biogenesis	unknown function	cell wall hydrolase	cell wall	VSA-AT (53-54)	in ECF	in TS	in LS			3.66873	2.46348	0.588513	-0.430609	1.29931	-3.37297	1.82905	2.81279	1.41901	0.617783	-1.02435	0.857316
K0MRZ8	BN194_01540	BN194_01540	WxL domain cell surface protein	BN194_01540	Cell wall biogenesis	Unknown/uncharacterized	Hypothetical cell surface protein	extracellular	VGA-TT (28-29)	in ECF											0.905424	1.60336	0.462434
K0N1B4	BN194_01550	BN194_01550	WxL surface cell wall-binding domain protein	BN194_01550	Cell wall biogenesis	Unknown/uncharacterized		extracellular	VLA-AQ (26-27)	in ECF											4.2	4.7	3.9b
K0N1V5	BN194_02560	BN194_02560	hypothetical protein BN194_02560	BN194_02560	Cell wall biogenesis	unknown function	cell wall-associated hydrolase	cell membrane	AIA-DH (36-37)	in ECF	in TS							2.3788	2.99763	-0.211743	0.873888	0.99416	-1.02806
K0N7S8	BN194_02820	BN194_02820	cell wall hydrolase, NlpC_P60 family protein	BN194_02820	cell wall biogenesis	peptidoglycan turnover?		extracellular	VSA-ST (32-33)	in ECF	in TS	in LS			1.34844	1.33084	-0.483363	0.823694	3.22549	-0.98447	1.49643	1.91225	-0.447313
K0N2I6	BN194_06750	BN194_06750	WxL domain cell surface protein	BN194_06750	Cell wall biogenesis	Unknown/uncharacterized		extracellular	VFA-AD (28-29)	in ECF											3.9	4.8	4.6b
K0N987	BN194_08770	pbpF	peptidoglycan glycosyltransferase/transpeptidase	PbpF	Cell wall biogenesis	peptidoglycan polymerization	Also extracellular	cell membrane		in ECF		in LS			-0.0960064	0.055006	-0.884818				2.3	2.3	NaNb
K0NBN4;K0MWS0	BN194_21340;BN194_21770	rmlB;rmlB_2		RmlB;RmlB_2	Cell wall biogenesis	rmlB;rmlB_2	dTDP-glucose 4,6-dehydratase	transmembrane			in TS							1.02847	1.86102	1.50003				0.01	0.1	1.09
K0N699;K0MWW4	BN194_21360;BN194_21790	rmlA;rmlA_2		rmlA;rmlA_2	Cell wall biogenesis	extracellular polysaccharide biosynthetic process	dTDP-4-dehydrorhamnose 3,5-epimerase family.	transmembrane			in TS	in LS			-0.103262	-0.170088	0.124352	NaN	1.20222	1.96508				-0.1	-0.18	1.01
K0N978	BN194_08620	dltD	undecaprenol-phosphate-poly(glycerophosphate subunit) D-alanine transfer protein	DltD	Cell wall biogenesis	teichoic acid D-alanylation		transmembrane				in LS			-0.645624	-0.705438	-1.56375
K0N819	BN194_14730	murG	UDP-N-acetylglucosamine-N-acetylmuramyl- (pentapeptide) pyrophosphoryl-undecaprenol N- acetylglucosamine transferase	MurG	Cell wall biogenesis	late peptidoglycan biosynthesis		cell membrane				in LS			-0.104395	0.0602652	-0.728113
K0MW71	BN194_18440	yqgF	peptidoglycan transpeptidase	PbpA	Cell wall biogenesis	peptidoglycan polymerization		transmembrane				in LS			0.197746	0.0667725	-1.09058
K0MWB2	BN194_19090	pbpF_2	peptidoglycan glycosyltransferase/transpeptidase	PbpF	Cell wall biogenesis		Penicillin-binding protein 1F	transmembrane				in LS			0.183653	0.413033	-0.0043087							-1.16233	-2.19322	-4.88363
K0NBE0	BN194_20070	BN194_20070	DUF4330 superfamily protein	BN194_20070	Cell wall biogenesis	unknown function	unknown-BLAST, binding peptidoglycan in bacteria	transmembrane				in LS			-0.498589	-0.159474	-1.46911
K0NBK5	BN194_21270	yheN	peptidoglycan deacetylase, Sm_PdgA family	YheN	Cell wall biogenesis	peptidoglycan deacetylation		transmembrane				in LS			0.971246	0.817451	-0.111217
K0MWS4	BN194_21390	BN194_21390	polyprenyl glycosylphosphotransferase	BN194_21390	Cell wall biogenesis	teichoic acid biosynthesis		transmembrane				in LS			0.157059	0.0533473	-0.518526
K0N1E7	BN194_01900	BN194_01900	pyridoxine 5'-phosphate oxidase, putative	BN194_01900	Cofactor-related metabolism		cytoplasm, extracellular	cell wall				in LS			0.586327	0.0795269	1.88962							0.416341	0.827071	-1.54361
K0N1T2	BN194_03700	BN194_03700	pyridoxine 5'-phosphate oxidase-like family protein	BN194_03700	Cofactor-related metabolism			cell wall				in LS			-0.131893	-0.0939693	1.03452							-0.109563	-0.269976	-0.729371
K0NAC0	BN194_13770	sufC	Fe-S cluster assembly, ATP-binding protein	SufC	Cofactor-related metabolism		Probable ABC transporter ATP-binding protein spyM18_0273	cell membrane				in LS			-0.418957	-0.266788	-1.60493							-0.138317	-1.55767	-2.88361
K0N734	BN194_24310	apbE_4	thiamine biosynthesis lipoprotein	ApbE	Cofactor-related metabolism	thiamine biosynthesis	FAD:protein FMN transferase	transmembrane	ACA-GK (22-23)			in LS	Lipo		-0.745824	-0.686695	-1.14368
K0NB89	BN194_19170	mecA	negative regulator of genetic competence; adaptor protein	MecA	Competence (DNA uptake)			extracellular				in LS			-0.0152543	0.152575	-0.585581							0.566602	-0.0464751	0.240468
K0MS45	BN194_02040	soj	chromosome partitioning ATP-binding protein	Soj	Cytokinesis		Sporulation initiation inhibitor protein soj, also IN CYTOPLASM	cell membrane				in LS			0.165689	0.193144	0.415127							0.384536	0.207605	-0.448881
K0MTZ2	BN194_10190	ftsE	cell division ATP-binding protein FtsE	FtsE	Cytokinesis	cell division; divisome complex		cell membrane			in TS	in LS			-0.110434	-0.102736	0.342213	NaN	NaN	1.06234				-0.0322704	2.09314	1.31156
K0N3G0	BN194_10200	ftsX	cell division protein FtsX	FtsX	Cytokinesis	cell division; divisome complex		cell membrane			in TS	in LS			-0.419577	-0.179029	-0.941479	0.469872	-0.0793587	NaN				0.619851	3.62565	3.11824
K0N4J2	BN194_14460	ezrA	septation ring formation regulator EzrA	EzrA	Cytokinesis			cell membrane				in LS			0.146956	0.488551	-1.12907							0.680787	3.10956	-0.885185
K0N4K0	BN194_14560	mreC	rod shape-determining protein mreC	MreC	Cytokinesis		cytoplasm	cell membrane	MYA-SN (30-31)			in LS			0.11213	0.10646	-1.62814							0.0165532	2.84137	0.145983
K0MV70	BN194_14590	minD	septum site-determining protein MinD	MinD	Cytokinesis			cell membrane				in LS			0.0929941	-0.122367	-0.185404							0.959665	1.62599	-0.762517
K0N4T3	BN194_14750	ftsA	cell division protein FtsA	FtsA	Cytokinesis			cell membrane				in LS			-0.0401732	0.0135975	-0.507201							-0.183779	0.486666	-1.11306
K0N5G4	BN194_17200	yrvJ	N-acetylmuramoyl-L-alanine amidase	YrvJ	Cytokinesis	cell division; septum splitting		cell membrane		in ECF		in LS			2.29559	2.20976	-0.744935				1.5671	1.8867	-0.19324
K0N4S9	BN194_14700	pbpB	septal peptidoglycan transpeptidase	PbpB/FtsI	Cytokinesis	cell division; divisome complex		transmembrane				in LS			0.961446	1.06082	0.107248
K0N1Y7	BN194_04750	yxeH	sugar phosphatase, cof subfamily	YxeH	General prediction only		hydrolase activity, also cytoplasm	cell membrane				in LS			-0.11783	0.118062	0.209522							0.134864	-0.2185	-2.84676
K0N957	BN194_08220	BN194_08220	HAD-like hydrolase superfamily protein Gph-like	BN194_08220	General prediction only		hydrolase activity, also cytoplasm	cell membrane				in LS			0.0458686	0.243812	1.09297							0.48137	-0.344905	-1.50165
K0MTK6	BN194_08240	BN194_08240	alpha/beta hydrolase family protein	BN194_08240	General prediction only		hydrolase activity, cytoplasm, extracellular	transmembrane				in LS			0.589667	0.627186	0.103856							-0.149488	2.06005	0.118504
K0N9U2	BN194_11320	ywpJ	hydrolase, HAD_like superfamily	ywpJ	General prediction only		hydrolase activity, also cytoplasm	cell membrane				in LS			0.102142	0.155757	-0.0126355							0.0106932	-0.107918	-0.473621
K0MUH2	BN194_11940	yerH	sex pheromone lipoprotein, CamS superfamily	YerH	General prediction only	conjugation-associated?	sex pheromone lipoprotein, CamS superfamily	cell membrane	SSS-TS (31-32)		in TS	in LS	Lipo		-0.486687	-0.550064	-1.33812	0.316598	-0.4538	-2.27598				0.0362301	2.41703	-0.0284348
K0N802	BN194_14530	BN194_14530	phosphatase/phosphohexomutase, HAD superfamily	BN194_14530	General prediction only		hydrolase activity, also cytoplasm	cell membrane				in LS			0.0328083	0.165761	0.0568425							0.670314	-0.536242	-1.38992
K0N4M3	BN194_14860	BN194_14860	phosphatase, halogen_hydrolase superfamily protein	BN194_14860	General prediction only			transmembrane				in LS			-0.0119985	0.122337	-0.281435							0.0169144	-0.0352828	-0.109241
K0N5L5	BN194_18410	yqhL	sulfurtransferase, rhodanese homology domain superfamily	yqhL	General prediction only			transmembrane				in LS			0.238954	0.359132	-0.475183							0.417706	3.69132	1.34572
K0NA57	BN194_22880	BN194_22880	ATP-grasp enzyme superfamily protein	BN194_22880	General prediction only		FemAB family protein	cell membrane				in LS			-0.00183233	0.0643635	-0.12075							0.984674	1.48436	0.460335
K0NC29	BN194_24320	BN194_24320	sex pheromone lipoprotein (similar to cAD1 in E. faecalis)	BN194_24320	General prediction only	conjugation?	flavin mono nucleotide-binding domain protein	cell membrane	SKA-SS (38-39)	in ECF	in TS	in LS	Lipo		-0.165156	0.00616455	-1.50363	0.550391	0.402256	0.235134				0.139872	2.07941	3.0138
K0NCA1	BN194_25320	ydhF	aldo/keto reductase family protein	YdhF	General prediction only	oxidoreductase activity	Oxidoreductase YdhF	extracellular				in LS			1.14476	0.97942	3.35986							-2.27573	-0.35097	2.59021
K0NCV9	BN194_26820	BN194_26820	DUF1934 superfamily protein	BN194_26820	General prediction only			cell membrane				in LS			-0.029061	0.268233	0.483736							0.297031	0.048221	1.00193
K0MXZ5	BN194_26840	ywfO	HD superfamily phosphohydrolase	YwfO	General prediction only			cell membrane				in LS			0.0865892	0.213855	-0.562895							0.328997	-0.525627	1.27977
K0MY36	BN194_27190	cobB	SIRH2 family protein	cobB	General prediction only		NAD-dependent protein deacetylase, also in cytoplasm	cell membrane				in LS			0.455387	0.664036	3.028							0.555631	0.944784	2.46785
K0NDD5	BN194_28520	yidA	hydrolase, HAD superfamily	YidA	General prediction only		hydrolase activity, also cytoplasm	cell membrane				in LS			-0.374233	-0.648115	1.21325							-0.899873	-0.0663109	0.150575
K0N4Z7	BN194_02080	BN194_02080		BN194_02080	General prediction only	unknown function		cell membrane			in TS	in LS			0.0161273	0.0724951	-0.586315	1.11262	0.884202	-0.591278				0.0357183	1.431	1.12119
K0N8Z0	BN194_07520	BN194_07520	phosphatase, HAD_like superfamily	BN194_07520	General prediction only		hydrolase activity, also cytoplasm	cell membrane				in LS			-0.606053	-0.61475	NaN
K0N401	BN194_12010	BN194_12010	hydrolase, HAD superfamily	BN194_12010	General prediction only		hydrolase activity, also cytoplasm	cell membrane				in LS			0.0809555	0.160196	1.54722							0.155921	-0.385797	NaN
K0NAZ9	BN194_17620	eep	membrane-associated Zn-dependent metalloprotease similar to alternative sigma factor repressor antagonist	RseP	General prediction only	unknown function (regulatory role?)	Zinc metalloprotease	transmembrane				in LS			-0.610963	-0.307744	-1.46135
K0N6F1	BN194_21910	BN194_21910	SGNH-hydrolase family protein	BN194_21910	General prediction only	unknown function	SGNH-hydrolase family protein, Putative acyltransferase	transmembrane	Yes			in LS			-0.0989227	0.109049	-1.10365
K0N7S1	BN194_24800	yhjA	CsbD superfamily protein	YhjA	General prediction only	stress response (phosphate starvation)?		extracellular				in LS			-0.397662	NaN	4.04078
K0MTP3	BN194_08790	birA	biotin-(acetyl-CoA carboxylase) ligase	BirA	Lipid-related metabolism		cytoplasm , EXTRACELLULAR, Bifunctional protein BirA	cell membrane				in LS			-0.354542	-0.390511	1.33742							0.853113	-1.14166	-1.7271
K0N5F1	BN194_17710	plsC	1-acyl-sn-glycerol-3-phosphate acyltransferase	PlsC	Lipid-related metabolism	phospholipid biosynthesis	ALSO cytoplasm	cell membrane				in LS			-0.0195878	-0.0434583	0.128825
K0N788	BN194_22500	BN194_22500	biotin carboxylase activity	BN194_22500	Lipid-related metabolism		biotin carboxylase activity	cell membrane				in LS			4.07641	3.23439	NaN							0.233922	1.8949	-0.820007
K0N6M5	BN194_22510	accC	Acetyl-CoA carboxylase biotin carboxylase subunit	accC	Lipid-related metabolism		Acetyl-CoA carboxylase biotin carboxylase subunit	cell membrane				in LS			3.55513	3.1631	NaN							0.431027	1.59054	-4.28828
K0N7S9	BN194_13580	atpF	ATP synthase subunit b	AtpF	Membrane bioenergetics	ATP synthesis, H+ extrusion		cell membrane			in TS	in LS			0.144847	0.176184	-0.452504	1.21377	1.46814	1.07053				0.1045	1.89324	1.95427
K0MV16	BN194_13590	atpH	ATP synthase subunit delta	AtpH	Membrane bioenergetics	ATP synthesis, H+ extrusion		cell membrane				in LS			-0.0587521	0.291627	-0.480326							0.607791	2.10463	2.8554
K0N4K1	BN194_13600	atpA	ATP synthase subunit alpha	AtpA	Membrane bioenergetics	ATP synthesis, H+ extrusion		Cell membrane			in TS	in LS			0.211522	0.240192	0.437151	1.22143	0.97984	2.65572				0.310549	1.45775	1.88564
K0N4D3	BN194_13610	atpG	ATP synthase subunit gamma	AtpG	Membrane bioenergetics	ATP synthesis, H+ extrusion	plasma membrane ATP synthesis coupled proton transport	cell membrane				in LS			-0.15974	0.0219714	-0.277365							0.235577	0.838694	1.9065
K0NAB3	BN194_13620	atpD	ATP synthase subunit beta	AtpD	Membrane bioenergetics	ATP synthesis, H+ extrusion		Cell membrane			in TS	in LS			-0.015543	0.0558465	-0.452023	NaN	NaN	2.57571				-0.032287	0.688234	1.83563
K0NAA7	BN194_24330	yjlD	NAD(P)H-disulfide dehydrogenase, pyr_redox superfamily	YumB	Membrane bioenergetics	ATP synthesis, H+ extrusion	yjlD, oxidoreductase activity, also in cytoplasm	transmembrane				in LS			-0.283117	-0.145492	-0.329256							0.271917	2.8776	1.11337
K0N7D4	BN194_01870	BN194_01870	hypothetical protein BN194_01870	BN194_01870	Membrane bioenergetics		Flavodoxin	cell membrane				in LS			0.253936	-0.0211309	3.28147							1.45645	1.17134	NaN
K0NA10	BN194_12070	qmcA	Band_7_stomatin_like family protein	qmcA	Membrane bioenergetics			transmembrane				in LS			-0.516024	-0.698564	-2.05383							-0.652665	0.435921	-1.27347
K0N4C9	BN194_13560	atpB	ATP synthase subunit a	AtpB	Membrane bioenergetics	ATP synthesis, H+ extrusion		cell membrane				in LS			-0.496413	-0.444814	-0.542716
K0N7T2	BN194_13630	atpC	ATP synthase subunit epsilon	AtpC	Membrane bioenergetics	ATP synthesis, H+ extrusion		cell membrane				in LS			0.0863679	0.0618248	NaN
K0N8I3	BN194_27250	ypuA	DUF1002 superfamily protein	YpuA	Other transporter proteins	unknown function	probable Tat pathway signal sequence domain protein	extracellular			in TS	in LS			0.372671	0.149422	-0.251623	-0.143282	0.141933	-4.13172				-0.478741	1.61174	0.851404
K0N322	BN194_08700	ykuT	small-conductance mechanosensitive channel	YkuT	Other transporter proteins			transmembrane				in LS			-0.183083	-0.175134	-0.927728							0.18556	1.53559	0.428988
K0NBC5	BN194_19820	BN194_19820	calcium-translocating P-type ATPase	BN194_19820	Other transporter proteins			transmembrane				in LS			-0.18613	-0.0938714	-1.31456							-0.0469017	2.95162	0.447198
K0MY02	BN194_26890	mscL	large-conductance mechanosensitive channel	MscL	Other transporter proteins			transmembrane				in LS			-0.318996	-0.0123768	-0.745405							0.306213	2.51597	1.66548
K0NB79	BN194_29430	zosA_2	heavy metal (Cd/Co/Hg/Pb/Zn)-translocating P-type ATPase	ZosA_2	Other transporter proteins			transmembrane				in LS			-1.39828	-0.950617	-1.65032							-0.573012	1.4353	1.52129
K0N647	BN194_06730	BN194_06730	hypothetical protein BN194_06730	BN194_06730	Other transporter proteins	unknown function	flik family flagellar hook-length control protein, FliK is a soluble component of the flagellar export apparatus	cell membrane	ASA-AT (29-30)	in ECF	in TS							NaN	0.80454	NaN	0.765592	0.24207	NaN
K0NB76	BN194_29380	BN194_29380	hypothetical protein	BN194_29380	Other transporter proteins	unknown function	flik family flagellar hook-length control protein	extracellular		in ECF											2.15428	1.81083	0.562393
K0NDJ8	BN194_29420	BN194_29420	hypothetical protein BN194_29420	BN194_29420	Other transporter proteins	unknown function	flik family flagellar hook-length control protein	transmembrane		in ECF	in TS							NaN	1.6614	NaNb	2.21827	2.83984	0.737448
K0N4D9	BN194_00630	ydhG	RND-type efflux transporter protein, MmpL family	YdhG	Other transporter proteins	unknown transport (efflux?)		transmembrane				in LS			0.177471	0.334248	0.886532
K0N796	BN194_01470	BN194_01470	xanthine/uracil/vitamin C permease family protein	BN194_01470	Other transporter proteins			transmembrane				in LS			1.5438	1.13941	0.551386							-0.730656	-0.757078	-2.02085
K0N2T0	BN194_06960	yfnA	amino acid permease	YfnA	Other transporter proteins	amino acid uptake		transmembrane				in LS			-0.242654	0.109207	-0.73855
K0MUB1	BN194_11490	pacL	cation uptake antiporter, P-type ATPase	PacL	Other transporter proteins			transmembrane				in LS			0.0720997	0.164212	-0.617382							-0.160591	1.17587	-0.221833
K0NC18	BN194_24170	mgtA	magnesium-transporting P-type ATPase	MgtA	Other transporter proteins			transmembrane				in LS			NaN	-0.171683	NaN
K0N5D0	BN194_02980	levF/manY	PTS(Glucose/Mannose family) IIC	LevF/ManY	Phosphotransferase systems	glucose/mannose uptake		transmembrane				in LS			-0.313403	-0.449185	-1.01725							-0.29233	2.1345	1.23317
K0MSE1	BN194_02990	manZ	PTS(Glucose/Mannose family) IID	LevG/ManZ	Phosphotransferase systems	Mannose permease IID component		transmembrane				in LS			-0.34104	-0.186425	-0.816477							-0.0955556	2.14503	1.0189
K0N1P6	BN194_03000	levD/manX	PTS(Glucose/Mannose family) IIA	LevD/ManX	Phosphotransferase systems	Putative PTS system mannose-specific EIIAB component	ALSO cytoplasm	cell membrane				in LS			1.09387	0.595095	1.72646							0.335908	-0.493388	0.525618
K0MT60	BN194_06940	bglP	PTS system beta-glucoside-specific transporter subunit IIBCA	BglP	Phosphotransferase systems			transmembrane				in LS			-1.20178	-1.00583	-0.94563							0.609023	2.48116	3.9709
K0N4S1	BN194_15410	fruA_3	PTS (fructose family) subunit IIABC	FruA3	Phosphotransferase systems	fructose uptake		cell membrane			in TS	in LS			-1.57201	-1.34844	-0.142055	NaN	NaN	2.889				-0.292963	2.11949	4.26278
K0N8F9	BN194_27050	BN194_27050	PTS (Galactitol family) IIA-2	BN194_27050	Phosphotransferase systems	galactitol/fructose specific		cell membrane				in LS			0.299435	0.402462	0.481106							0.774668	0.00656128	-0.523376
K0N954	BN194_29700	manZ_9	PTS (Mannose/Fructose/Sorbose family) IID	ManZ_9	Phosphotransferase systems			transmembrane				in LS			0.235129	0.162464	-0.817214							0.618483	3.13016	1.58314
K0N8G4	BN194_29710	sorA_4	PTS (Mannose/Fructose/Sorbose family) IIC	ManY	Phosphotransferase systems		sorA_4	transmembrane				in LS			6.03994e-05	0.103478	-1.1381							0.224794	3.14162	0.870315
K0N8X8	BN194_07420	BN194_07420	PTS (Galactitol family) IIA	BN194_07420	Phosphotransferase systems	galactitol uptake	ALSO cytoplasm	extracellular				in LS			1	0.5	1.7b
K0N861	BN194_28560	BN194_28560	PTS (ascorbate family) subunit IIB	UlaB	Phosphotransferase systems	ascorbate uptake		cell membrane				in LS			0.671667	0.563718	5.75784
K0N975	BN194_08570	trxA_2	thioredoxin	TrxA2	Posttranslational modification			extracellular				in LS			-0.0468229	-0.219133	1.42243							0.0883408	-0.173637	-5.1813
K0N3L1	BN194_10360	trxB	thioredoxin reductase	TrxB	Posttranslational modification			cell membrane				in LS			-0.0959918	-0.0217806	0.519414							0.465288	0.693732	1.36723
K0N9F1	BN194_18980	ytpP	thioredoxin family protein	TypP	Posttranslational modification			extracellular				in LS			0.465673	0.0660483	2.17302							0.189616	-0.216695	-3.67926
K0NBX6	BN194_23520	ptp3	tyrosine-protein phosphatase	Ptp3	Posttranslational modification			extracellular				in LS			-0.522517	-0.318614	-2.12157							0.657246	-2.22469	-2.60548
K0N8C2	BN194_29310	BN194_29310	protein-tyrosine/serine phosphatase, PTPc superfamily	BN194_29310	Posttranslational modification		Transcriptional regulator	extracellular				in LS			0.874842	0.894438	2.05045							0.405663	0.739455	-0.0885881
K0N1V9	BN194_02610	lepB	signal peptidase I	LepB	Protein export			transmembrane				in LS			0.069507	0.18155	0.0824604							0.357987	1.84102	1.8714
K0MTL6	BN194_08390	yrbF	preprotein translocase insertion/stabilisation protein	YajC	Protein export	protein secretion: Sec system (insertion)		transmembrane			in TS	in LS			-0.0540403	0.151719	-0.25118	-0.151681	-1.58047	-1.87452				-0.196035	1.60864	2.36551
K0N9J2	BN194_10170	secA	Protein translocase subunit SecA	SecA	Protein export			cell membrane			in TS	in LS			-0.0838496	0.0471547	-0.852451	NaN	NaN	1.98852				0.625224	1.47478	1.41593
K0N5R8	BN194_17850	ftsY	signal recognition particle receptor	FtsY	Protein export		SRP-dependent cotranslational protein targeting to membrane, ALSO IN CYTOPLASM	cell membrane				in LS			-0.41381	-0.465868	0.797175							-0.0181732	-1.23567	0.114537
K0NCJ6	BN194_26020	secY	preprotein translocase apparatus protein	SecY	Protein export			transmembrane				in LS			-0.130007	-0.195721	0.304414							0.374689	2.9653	3.18395
K0N9D1	BN194_18630	yidC1	preprotein translocase insertion/stabilisation protein	YidC	Protein export	protein secretion: Sec system (insertion)	Membrane protein insertase YidC 1	transmembrane	Yes			in LS	Lipo		-0.0764357	-0.311165	-0.879803
K0MVC6	BN194_15340	clpX	ATP-dependent Clp protease ATP-binding subunit ClpX	ClpX	Protein folding/turnover		ALSO cytoplasm	cell membrane				in LS			-0.468091	-0.494418	-0.626297							0.120156	0.0706984	-0.574798
K0N5Q8	BN194_19060	prsA	foldase protein prsA	PrsA	Protein folding/turnover	protein secretion: exported protein folding	ALSO cytoplasm	cell membrane	KGA-KV (31-32)		in TS	in LS	Lipo		-0.374562	-0.557774	-0.922222	0.867134	0.121765	-3.53071				-0.0546977	1.91115	2.01962
K0N644	BN194_19450	clpE	ATP-dependent Clp protease ATP-binding subunit ClpE	ClpE	Protein folding/turnover	recycling defective proteins	ALSO cytoplasm	cell membrane			in TS	in LS			0.893279	0.944663	0.956291	-0.894329	1.07762	2.98854				0.244169	0.219117	2.15688
K0N5T8	BN194_19460	clpB_2	ATP-dependent chaperone/Clp protease	ClpB_2	Protein folding/turnover	recycling defective proteins	ALSO cytoplasm	cell membrane			in TS	in LS			0.92387	0.963002	0.891313	-0.178493	0.988363	2.52498				0.12104	0.0641664	2.14273
K0N9Z7	BN194_21680	clpC	ATP-dependent Clp protease ATP-binding subunit	ClpC	Protein folding/turnover	recycling defective proteins	ALSO cytoplasm	cell membrane			in TS	in LS			-0.129442	-0.269428	0.576607	0.619919	1.14328	2.84107				0.796023	1.19773	3.12018
K0N887	BN194_26350	clpB_2	Clp endopeptidase ATP-binding subunit	ClpB2	Protein folding/turnover		ALSO cytoplasm	cell membrane				in LS			0.211735	0.175388	0.0806707							-0.0397002	-0.232645	-0.559257
K0N7I8	BN194_26460	ftsH	ATP-dependent zinc metalloprotease FtsH	FtsH	Protein folding/turnover	membrane protein assemby/recycling	Non-classically secreted	cell membrane			in TS	in LS			-0.104758	-0.0464109	-0.732288	0.227686	0.221014	-0.579269				-0.172795	1.78397	0.737911
K0MYM2	BN194_29440	BN194_29440	alpha-crystallin domain heat shock protein	BN194_29440	Protein folding/turnover	protein disaggregation (during rapid growth)	cytoplasm , Acid shock protein	cell wall			in TS	in LS			-0.567607	-1.36195	1.67498	NaN	-0.113777	4.43082				3.09986	5.38566	7.16739
K0N8D9	BN194_29460	htrA	heat-shock protein serine protease	HtrA/DegP	Protein folding/turnover	recycling defective proteins; protein folding; stress response	Non-classically secreted	transmembrane		in ECF	in TS	in LS			0.174719	0.23243	2.4543	3.32322	4.89263	3.05298	1.39519	1.65363	2.25163	0.292021	1.42072	2.61138
K0N8Z3	BN194_07570	hsp18	alpha-crystallin domain heat shock protein	Hsp18	Protein folding/turnover	protein disaggregation (during rapid growth)		cell wall				in LS			-5.32225	-5.19406	-5.24222
K0N8G1	BN194_15880	ctpA	carboxy-terminal processing proteinase	CtpA	Protein folding/turnover			transmembrane				in LS			-0.153116	-0.338268	-0.407278
K0NAC7	BN194_13920	yueI	DUF1694 superfamily protein	YueI	Ribosomal proteins			extracellular				in LS			0.528612	0.659927	0.764101							0.568729	0.726018	-1.26814
K0N6T2	BN194_00120	rpsR	30S ribosomal protein S18	RspR	Ribosomal proteins	30S (SSU) ribosome	Also cytoplasm	cell membrane			in TS	in LS			-0.0440795	-0.255263	-0.0840378	NaN	NaN	1.79193				0.268609	0.60519	1.04079
K0N5Y4	BN194_18800	rplT	50S ribosomal protein L20	RplT	Ribosomal proteins	50S (LSU) ribosome	ALSO CYTOPLASM	cell membrane			in TS	in LS			-0.387811	-0.317914	-0.675811	NaN	NaN	3.28939				0.767504	0.887463	0.171838
K0N5P1	BN194_18810	rpmI	50S ribosomal protein L35	RpmI	Ribosomal proteins	50S (LSU) ribosome		extracellular	RAS-AK (10-11)		in TS	in LS			0.00824928	-0.235424	1.3337	-1.24748	0.0906947	NaN				-0.399288	0.00472832	0.499352
K0N841	BN194_25950	rplQ	50S ribosomal protein L17	RpsQ	Ribosomal proteins	50S (LSU) ribosome	Also cytoplasm	cell membrane			in TS	in LS			0.0313613	-0.171179	-0.16256	-0.119924	0.941517	4.73454				0.288421	-0.118821	-0.772552
K0NCJ0	BN194_25970	rpsK	30S ribosomal protein S11	RpsK	Ribosomal proteins	30S (SSU) ribosome	Also cytoplasm	cell membrane			in TS	in LS			-0.378456	-0.264425	0.415254	-0.0840969	2.57503	1.86989				0.548674	0.565912	0.228863
K0MXU1	BN194_26190	rplB	50S ribosomal protein L2	RplB	Ribosomal proteins	50S (LSU) ribosome	Also cytoplasm	extracellular		in ECF	in TS	in LS			-0.29239	-0.161702	-0.658383	0.939102	0.914336	1.55781	-0.32261	-0.837767	1.13489	0.510954	0.682921	-0.470127
K0N7H0	BN194_26210	rplD	50S ribosomal protein L4	RplD	Ribosomal proteins	50S (LSU) ribosome	Also cytoplasm	cell membrane		in ECF	in TS	in LS			-0.221706	-0.15971	0.0346648	0.954214	0.209894	4.37403	-0.823631	-1.64022	0.88526	0.306884	0.600358	-0.531553
K0MXR0	BN194_25840	rpsI	30S ribosomal protein S9	RpsI	Ribosomal proteins	30S (SSU) ribosome	Also cytoplasm	extracellular			in TS							1.01014	1.8353	NaN				-1.71762	-1.79118	-3.80865
K0N4T0	BN194_15510	rpmF	50S ribosomal protein L32	RpmF	Ribosomal proteins	50S (LSU) ribosome		cell membrane				in LS			-0.162494	-0.175098	1.46952
K0NAA5	BN194_24280	rpmG2	50S ribosomal protein L33	RpmG2	Ribosomal proteins	50S (LSU) ribosome	ALSO cytoplasm	Cell membrane				in LS			-0.0664069	-0.170509	1.90808
K0N365	BN194_08710	ytxG	divergent methyl-accepting chemotaxis-like domain, DUF948 superfamily	YtxG	Signal transduction		ALSO extracellular	transmembrane				in LS			0.252015	0.041146	-0.375908							0.527918	1.26172	0.86551
K0N507	BN194_02130	vanS	cell wall integrity sensing histidine kinase CesK	vanS	Signal transduction	cell wall alteration signalling	Sensor protein vanS	transmembrane				in LS			-0.326783	-0.389449	-0.729311
K0MV29	BN194_13840	BN194_13840	DUF2785 superfamily protein	BN194_13840	Transcriptional regulation	Putative transcriptional regulator family	Putative transcriptional regulator family	cell membrane				in LS			-0.20305	-0.154196	-0.780588							-0.345257	-1.36358	-1.30367
K0MS94	BN194_02540	lytR	LytR family cell envelope-related function transcriptional attenuator	LytR	Transcriptional regulation	unknown regulation		extracellular			in TS	in LS			0.710453	0.204226	-0.107576	1.98189	1.83048	NaN				0.430686	1.17283	0.963151
K0N260	BN194_05600	BN194_05600	HTH_XRE family transcriptional regulator	BN194_05600	Transcriptional regulation			extracellular				in LS			0.681646	0.650989	0.992609							0.501731	0.103382	0.274004
K0N6L8	BN194_08730	niaR	NAD biosynthesis repressor, HTH_11/3M domain superfamily	niaR	Transcriptional regulation			cell membrane				in LS			0.0636673	0.119387	0.165669							0.0845744	-0.0822976	1.25357
K0N3E1	BN194_10050	BN194_10050	HTH_XRE transcriptional regulator	BN194_10050	Transcriptional regulation		ALSO extracellular	cell membrane				in LS			-0.188718	-0.157889	-0.264637							0.368029	2.13914	2.3464
K0MUM1	BN194_12190	BN194_12190	TetR family transcriptional regulator	BN194_12190	Transcriptional regulation		Also cytoplasm	cell membrane				in LS			-0.150744	-0.201607	-0.958085							-0.166323	-1.14047	-1.7494
K0N4E8	BN194_13860	BN194_13860	HTH_XRE family transcriptional regulator	BN194_13860	Transcriptional regulation		ALSO extracellular	cell membrane				in LS			0.950911	0.928989	-0.0194918							0.789496	1.76189	-2.28667
K0N915	BN194_17480	hrcA	Heat-inducible transcription repressor HrcA	HrcA	Transcriptional regulation			cell membrane				in LS			0.37985	0.15552	0.663155							0.989534	0.388995	0.510429
K0N6U3	BN194_21700	lytR_3	transcriptional regulator, LytR_cspA-psr superfamily	lytR_3	Transcriptional regulation			extracellular	VLL-VL (10-11)			in LS			-0.0901807	-0.212136	-2.01627							0.507419	0.897822	-1.98359
K0N6Y7	BN194_23510	BN194_23510	XRE family transcriptional regulator	BN194_23510	Transcriptional regulation	regulatory role unknown		cell membrane			in TS	in LS			0.05863	0.17116	-0.528445	-0.743375	-0.621874	-1.70688				0.052405	-0.417929	1.13372
K0NDP4	BN194_30170	BN194_30170	HTH_XRE family transcriptional regulator	BN194_30170	Transcriptional regulation			extracellular				in LS			-0.202138	-0.0601648	-0.310088							0.0805283	-0.900822	0.242898
K0NA85	BN194_23780	lytR_4	LytR_CspA family transcriptional regulator	LytR_4	Transcriptional regulation	regulatory role unknown		extracellular		in ECF		in LS			1.05894	0.204255	-2.36687				1.1	2.4	NaNb
K0MUG0	BN194_11890	BN194_11890	Zinc ribbon domain containing protein	BN194_11890	tRNA aminoacyl synthesis	unknown function	membrane protein	transmembrane				in LS			-0.978699	-1.04508	-1.73932
K0N584	BN194_16910	trmK	tRNA (adenine(22)-N(1))-methyltransferase	TrmK	tRNA/Ribosome assembly/processing		ALSO cytoplasm	cell membrane				in LS			-0.42145	-0.0430908	-1.11118							0.122574	-1.90184	-1.97016
K0NDS2	BN194_30620	rnpA	ribonuclease P protein component	RnpA	tRNA/Ribosome assembly/processing			cell membrane				in LS			0.891654	-0.155094	1.24194							0.682511	1.44582	-0.634996
K0MVQ8	BN194_16990	era	16S rRNA-binding GTPase	Era	tRNA/Ribosome assembly/processing	ribosome processing (SSU)	ALSO cytoplasm	cell membrane				in LS			-0.177772	-0.266359	0.162829
K0N116	BN194_00400	BN194_00400	hypothetical protein BN194_00400	BN194_00400	Unknown/uncharacterized			extracellular				in LS			0.622069	0.421817	0.0897751							0.424327	-0.952227	-0.62303
K0N181	BN194_01150	BN194_01150	hypothetical protein BN194_01150	BN194_01150	Unknown/uncharacterized		ALSO extracellular	cell membrane				in LS			-0.15325	0.374083	0.453586							0.0476875	0.324153	-2.48856
K0N1N3	BN194_01760	BN194_01760	hypothetical protein BN194_01760	BN194_01760	Unknown/uncharacterized			cell membrane				in LS			-0.0284774	-0.191787	1.03001							-0.0183016	-0.928339	-1.98029
K0MS25	BN194_01790	BN194_01790	hypothetical protein BN194_01790	BN194_01790	Unknown/uncharacterized	unknown function	Putative membrane protein	transmembrane			in TS	in LS			0.0646114	0.0395374	-0.0741959	0.998241	-0.326103	-1.24008				0.686028	2.39296	1.02697
K0N4V4	BN194_01830	BN194_01830	hypothetical protein BN194_01830	BN194_01830	Unknown/uncharacterized			extracellular				in LS			2.07105	-0.0110696	2.14606							0.618109	-0.611745	-5.80001
K0N555	BN194_02480	BN194_02480	hypothetical protein BN194_02480	BN194_02480	Unknown/uncharacterized			extracellular				in LS			0.177497	0.0587025	0.592159							-0.00727844	-1.23286	-2.75207
K0N1P1	BN194_02900	BN194_02900	hypothetical protein BN194_02900	BN194_02900	Unknown/uncharacterized	unknown function	unknown-BLAST	cell membrane			in TS	in LS			0.000219981	-0.101569	1.34782	NaN	NaN	0.415226				0.579713	-0.439086	1.08048
K0N2Y6	BN194_07660	BN194_07660	hypothetical protein BN194_07660	BN194_07660	Unknown/uncharacterized	unknown function	unknown-BLAST	extracellular				in LS			-0.243456	-0.0357488	-0.593869							0.175387	0.69131	-1.14633
K0MTK3	BN194_08190	BN194_08190	hypothetical protein BN194_08190	BN194_08190	Unknown/uncharacterized			transmembrane				in LS			-0.109999	-0.030166	0.347526							-0.0371946	-0.281857	0.270611
K0N358	BN194_08510	BN194_08510	DUF965 superfamily protein	BN194_08510	Unknown/uncharacterized			extracellular				in LS			1.24075	0.901606	NaN							0.474351	0.179466	-2.31521
K0N6K6	BN194_08530	BN194_08530	DUF1292 superfamily protein	BN194_08530	Unknown/uncharacterized			extracellular				in LS			-0.453178	-0.0329863	0.188532							-0.16902	-1.27205	-1.56471
K0N984	BN194_08720	BN194_08720	YtxH superfamily protein	BN194_08720	Unknown/uncharacterized		unknown-BLAST	extracellular			in TS	in LS			-0.0660159	0.0488071	-0.577347	0.937678	0.63496	0.57277				0.349892	0.879251	1.35529
K0N348	BN194_09100	ykuJ	DUF1797 superfamily protein	ykuJ	Unknown/uncharacterized			extracellular				in LS			0.122357	-0.195403	1.48164							0.352679	-0.994003	-3.453
K0N3H5	BN194_10300	ythC	PspC domain-containing protein	YthC	Unknown/uncharacterized	bacterial adhesin	PspC domain-containing protein, bacterial adhesin	cell membrane			in TS	in LS			0.556131	0.656096	0.661584	1.19446	2.7491	5.79896				-0.210846	-0.760067	0.228508
K0N9Y6	BN194_11770	BN194_11770	hypothetical protein BN194_11770	BN194_11770	Unknown/uncharacterized			extracellular				in LS			1.63127	1.50642	4.8472							0.546061	0.482416	0.0277882
K0N7T4	BN194_13680	BN194_13680	DUF2969 superfamily protein	BN194_13680	Unknown/uncharacterized			extracellular				in LS			-0.699756	-0.584785	-0.334699							0.313858	-1.96406	-3.18431
K0N856	BN194_15030	BN194_15030	DUF1447 superfamily protein	BN194_15030	Unknown/uncharacterized			cell membrane				in LS			0.407459	0.190757	NaN							-0.879349	-1.19527	-1.95701
K0N4Y3	BN194_15300	ysoA	protein with TPR repeats	YsoA	Unknown/uncharacterized		cell cycle regulation, transcriptional control, mitochondrial and peroxisomal protein transport, neurogenesis and protein folding	cell membrane				in LS			-0.242132	-0.0823231	-0.933385							0.234689	-0.453183	-3.17633
K0N517	BN194_15750	ypiA	TPR-repeat lipoprotein family protein	YpiA	Unknown/uncharacterized		cell cycle regulation, transcriptional control, mitochondrial and peroxisomal protein transport, neurogenesis and protein folding	cell membrane				in LS			0.216318	0.406943	0.643626							0.15252	0.0440261	0.703872
K0N8E8	BN194_15780	BN194_15780	DUF161/DUF2179 superfamily protein	BN194_15780	Unknown/uncharacterized		also extracellular, CYTOPLASM	cell membrane				in LS			0.570142	0.4998	0.432295							-0.215707	0.521156	-1.21075
K0MVS9	BN194_17290	BN194_17290	DUF1093 superfamily protein	BN194_17290	Unknown/uncharacterized	unknown function	unknown-BLAST	transmembrane			in TS	in LS			-0.0550645	0.266799	-1.29495	0.54119	0.788165	-2.71734				-0.574244	1.97958	1.92663
K0MVY5	BN194_17740	yneF	UPF0154 superfamily protein	YneF	Unknown/uncharacterized			transmembrane				in LS			-0.698102	-0.342737	-1.16705							0.634369	2.30236	2.65122
K0N5I6	BN194_17960	BN194_17960	Dak2 domain fusion protein	BN194_17960	Unknown/uncharacterized	unknown function	glycerine kinase activity, CYTOPLASM	extracellular			in TS	in LS			0.0492643	0.107163	0.0526422	NaN	NaN	3.24617				0.00322215	0.479949	-0.360715
K0N9A7	BN194_18230	yqhY	DUF322 superfamily protein	YqhY	Unknown/uncharacterized		Asp23	cell wall				in LS			0.17177	0.235959	-0.293641							-1.06848	1.27593	0.0731417
K0N9F7	BN194_19080	yheA	DUF964 superfamily protein	YheA	Unknown/uncharacterized	unknown function	ymcA-like domain	cell membrane			in TS	in LS			0.259773	-0.365498	-3.02201	0.343554	-0.729758	-3.09394				0.234281	-0.400903	-2.56104
K0NBA0	BN194_19470	BN194_19470	DUF1827 superfamily protein	BN194_19470	Unknown/uncharacterized			extracellular				in LS			0.543845	0.560027	1.51949							0.281439	1.0808	0.520971
K0N5W5	BN194_19810	BN194_19810	hypothetical protein BN194_19810	BN194_19810	Unknown/uncharacterized			extracellular				in LS			0.418402	0.931339	1.24488							0.634159	2.07486	-1.89564
K0N5Z4	BN194_20160	BN194_20160	hypothetical protein BN194_20160	BN194_20160	Unknown/uncharacterized			extracellular				in LS			-1.19936	-0.705917	-1.4789							0.389382	-2.98292	-4.86369
K0NBH5	BN194_20720	BN194_20720	hypothetical protein BN194_20720	BN194_20720	Unknown/uncharacterized			extracellular				in LS			-0.545075	-0.921209	2.10248							-0.0302416	-0.527433	-0.300016
K0N6R7	BN194_21450	BN194_21450	hypothetical protein BN194_21450	BN194_21450	Unknown/uncharacterized			transmembrane				in LS			0.171415	0.251469	-0.0477689							-0.0418574	3.00445	1.26717
K0NBV1	BN194_22970	BN194_22970	COG2013 superfamily protein	BN194_22970	Unknown/uncharacterized			extracellular				in LS			0.0913677	0.340769	-0.247459							-0.226791	-0.517516	0.238866
K0N6Y5	BN194_23460	BN194_23460	hypothetical protein BN194_23460	BN194_23460	Unknown/uncharacterized			extracellular				in LS			-0.281625	-0.00714429	-0.914181							0.216447	0.391566	-0.86495
K0MXB4	BN194_23540	BN194_23540	hypothetical protein BN194_23540	BN194_23540	Unknown/uncharacterized			extracellular				in LS			-0.216157	0.357805	-0.493202							-0.316865	0.363937	-3.12855
K0MXC2	BN194_23740	BN194_23740	DUF1827 superfamily protein	BN194_23740	Unknown/uncharacterized		also extracellular	cell membrane				in LS			0.0539824	-0.303105	1.41115							0.420879	0.223139	0.676107
K0MXD1	BN194_23940	yaaQ	DUF970 superfamily protein	YaaQ	Unknown/uncharacterized	sensing of DNA-integrity, cell wall metabolism and potassium transport	also extracellular, CYTOPLASM	cell membrane				in LS			0.889668	0.925292	0.927464							1.54092	2.07782	2.29994
K0N715	BN194_24010	yjbJ	hypothetical protein BN194_24010	YjbJ	Unknown/uncharacterized			extracellular	VCA-KS (26-27)			in LS			0.184835	0.21913	0.825939							0.542356	1.16671	2.89064
K0NC47	BN194_24620	BN194_24620	PIN_SF superfamily protein	BN194_24620	Unknown/uncharacterized			transmembrane				in LS			-0.0807807	0.0127125	-0.000968297							-0.471808	1.38873	0.392213
K0N752	BN194_24660	yhaI	DUF805 superfamily protein	YhaI	Unknown/uncharacterized		Inner membrane protein	transmembrane				in LS			0.516904	0.376032	0.36469							0.324086	2.67125	1.49502
K0NAC8	BN194_24780	BN194_24780	hypothetical protein BN194_24780	BN194_24780	Unknown/uncharacterized			extracellular				in LS			-1.65849	-1.6157	-2.30805							-0.953622	-4.14585	-3.56625
K0N764	BN194_24860	BN194_24860	hypothetical protein BN194_24860	BN194_24860	Unknown/uncharacterized	unknown function	unknown-BLAST	extracellular				in LS			0.324403	0.146221	2.21974							-0.00801849	-1.50149	-2.9905
K0MXR4	BN194_25890	BN194_25890	hypothetical protein BN194_25890	BN194_25890	Unknown/uncharacterized	unknown function	ALSO CYTOPLASM	extracellular		in ECF	in TS	in LS			1.63371	0.0689309	2.25134	NaN	NaN	1.89266	NaN	NaN	3.3b	0.541306	0.755442	-0.0655823
K0N7Q6	BN194_27210	BN194_27210	hypothetical protein BN194_27210	BN194_27210	Unknown/uncharacterized			cell membrane				in LS			-0.174422	-0.267621	1.28595							-0.172651	-0.643073	-4.05678
K0N8J7	BN194_27350	lemA	LemA superfamily protein	LemA	Unknown/uncharacterized	unknown function	transmembrane protein with an extracellular N terminus	transmembrane			in TS	in LS			-0.366091	-0.164658	-0.802738	-0.208195	0.0645498	NaN				0.186771	1.04114	1.28622
K0NAX5	BN194_27530	BN194_27530	hypothetical protein BN194_27530	BN194_27530	Unknown/uncharacterized			extracellular				in LS			0.303754	-0.392593	-0.798199							0.725073	-0.817113	-4.03455
K0N8V3	BN194_28350	BN194_28350	DUF1341 superfamily protein	BN194_28350	Unknown/uncharacterized			extracellular				in LS			0.770708	0.910225	2.53654							0.728991	0.946014	2.40507
K0N932	BN194_29450	BN194_29450	hypothetical protein BN194_29450	BN194_29450	Unknown/uncharacterized	unknown function	unknown-BLAST	extracellular				in LS			0.246461	-0.126897	2.39694							0.637384	1.11696	1.65734
K0N968	BN194_29850	BN194_29850	hypothetical protein BN194_29850	BN194_29850	Unknown/uncharacterized			extracellular				in LS			0.485167	NaN	0.980679							0.785774	0.0849024	-0.142494
K0N4J7	BN194_01080	BN194_01080	hypothetical protein BN194_01080	BN194_01080	Unknown/uncharacterized	unknown function		extracellular	IVA-DM (24-25)	in ECF	in TS	in LS			4.90091	3.92987	3.46975	NaN	0.219188	1.50151	1.3	4.9b	2.4b
K0N2E5	BN194_05260	yvcC	von Willebrand factor type A domain protein	YvcC	Unknown/uncharacterized	unknown function	von Willebrand factor type A domain protein	extracellular	VTA-AA (35-36)	in ECF		in LS			0.829019	-0.231959	-1.29141				1.35531	1.39197	0.230471
K0N3K8	BN194_10310	BN194_10310	hypothetical protein BN194_10310	BN194_10310	Unknown/uncharacterized	unknown function		transmembrane			in TS							NaN	NaN	0.39b
K0N947	BN194_08020	BN194_08020	hypothetical protein BN194_08020	BN194_08020	Unknown/uncharacterized	unknown function	unknown-BLAST	transmembrane				in LS			0.663383	0.63634	0.509022							-0.0165679	0.94098	1.03291
K0MTS0	BN194_09190	BN194_09190	hypothetical protein BN194_09190	BN194_09190	Unknown/uncharacterized	unknown function	membrane protein	transmembrane				in LS			0.114285	0.290464	1.95935
K0N456	BN194_12100	yxeA	DUF1093 superfamily protein	YxeA	Unknown/uncharacterized			extracellular				in LS			-0.365601	-0.164824	-1.21416							NaNb	0.052927	2.91505
K0NAJ2	BN194_15370	BN194_15370	hypothetical protein BN194_15370	BN194_15370	Unknown/uncharacterized			extracellular				in LS			3.49519	2.13725	5.77532							0.128769	4.41785	NaNb
K0MVD8	BN194_15540	BN194_15540	hypothetical protein BN194_15540	BN194_15540	Unknown/uncharacterized			extracellular				in LS	Lipo		0.193057	0.327152	0.482821							0.0338866	2.67129	1.42902
K0NB37	BN194_17970	yloU	DUF322 superfamily protein	YloU	Unknown/uncharacterized	unknown function	general stress protein, Alkaline shock protein Asp23	extracellular				in LS			0.299694	0.252974	0.209401
K0N9E3	BN194_18830	fNV1452	hypothetical protein BN194_18830	FNV1452	Unknown/uncharacterized	unknown function	sseB protein	extracellular				in LS			-0.309652	-0.293282	-0.962227
K0N613	BN194_19050	BN194_19050	YtxH superfamily protein	BN194_19050	Unknown/uncharacterized	unknown function	Gas vesicle protein	cell membrane				in LS			-0.76413	-0.956141	-0.797586
K0MWI3	BN194_20240	BN194_20240	hypothetical protein BN194_20240	BN194_20240	Unknown/uncharacterized	unknown function	unknown-BLAST	cell membrane	ANA-GT (29-30)			in LS			2.6	1.3	0.1b
K0N9Y1	BN194_21380	BN194_21380	hypothetical protein BN194_21380	BN194_21380	Unknown/uncharacterized			extracellular	SQS-SS (27-28)			in LS	Lipo		1.99292	1.90429	-0.975646							1.05453	1.76925	0.16b
K0NBV0	BN194_22920	yuaG	Band_7_flotillin family protein	yuaG	Unknown/uncharacterized			transmembrane				in LS			-0.476182	-0.385096	NaN							-1.31601	-0.398858	NaN
K0NC21	BN194_24220	BN194_24220	hypothetical protein BN194_24220	BN194_24220	Unknown/uncharacterized	unknown function	additional lipoprotein component of cobalamin ECF transporter	extracellular	GNA-AK (27-28)			in LS	Lipo		0.641836	0.472621	1.78321
K0MXN3	BN194_25540	BN194_25540	hypothetical protein BN194_25540	BN194_25540	Unknown/uncharacterized	unknown function	unknown-BLAST	extracellular	CQS-KS (22-23)			in LS	Lipo		0.767462	0.00548108	-0.438306
K0NCG9	BN194_25820	BN194_25820	hypothetical protein BN194_25820	BN194_25820	Unknown/uncharacterized	unknown function	Extracellular protein	extracellular	TQA-EQ (32-33)			in LS			-0.413074	-0.438963	-1.06766
K0N7N4	BN194_27010	veg	DUF1021 superfamily protein	Veg	Unknown/uncharacterized	unknown function	biofilm formation	extracellular				in LS			NaN	-0.262552	NaN
K0N2K4	BN194_04840;BN194_06900	BN194_04840;BN194_06900		BN194_04840;BN194_06900			Uncharacterized ABC transporter ATP-binding protein TM_0288	transmembrane				in LS			0.15163	0.247358	0.124881
K0N889	BN194_04870	pip		pip			Phage infection protein	transmembrane				in LS			0.1912	0.101257	-0.597725
aNaN = zero LFQ value, indicating that proteins were below the limits of detection at the temperature or extraction condition noted. If a value is '0.00' this indicates that the log2 difference between the control and test was zero.
bWhen proteins were not detected (NaN) in the control at 30oC, log2 differences were calculated using imputed numbers generated using default settings in the Perseus software package
